1  
2  
3  
4  
5  
6  
7  
8  
9  
10  
11  
12  
13  
14  
15  
16  
17  
18  
19  
20  
21  
22  
23  
24  
25  
26  
27  
28  
29  
30  
31  
32  
33  
34  
35  
36  
37  
38  
39  
40  
41

# Cyclin A and Cks1 promote kinase consensus switching to non-proline directed CDK1 phosphorylation

Aymen al-Rawi<sup>1,2</sup>, Svitlana Korolchuk<sup>3</sup>, Jane Endicott<sup>3</sup>, Tony Ly<sup>1\*</sup>

<sup>1</sup> Centre for Gene Regulation and Expression, School of Life Sciences, University of Dundee, DD1 5EH

<sup>2</sup> Wellcome Centre for Cell Biology, School of Biological Sciences, University of Edinburgh, Edinburgh EH9 3BF

<sup>3</sup> Medical School, Newcastle University, Newcastle upon Tyne, NE2 4HH

\* Correspondence to: [tly@dundee.ac.uk](mailto:tly@dundee.ac.uk)

Page Break

## Summary

Ordered protein phosphorylation by CDKs is a key mechanism for regulating the cell cycle. How temporal order is enforced in mammalian cells remains unclear. Using a fixed cell kinase assay and phosphoproteomics, we show how CDK1 activity and non-catalytic CDK1 subunits contribute to the choice of substrate and site of phosphorylation. Increases in CDK1 activity alters substrate choice, with intermediate and low sensitivity CDK1 substrates enriched in DNA replication and mitotic functions, respectively. This activity dependence was shared between Cyclin A- and Cyclin B-CDK1. Cks1 has a proteome-wide role as an enhancer of multisite CDK1 phosphorylation. Contrary to the model of CDK1 as an exclusively proline-directed kinase, we show that Cyclin A and Cks1 promote non-proline directed phosphorylation, preferably on sites with a +3 lysine residue. Indeed, 70% of cell cycle regulated phosphorylations, where the kinase carrying out this modification has not been identified, are non-proline directed CDK1 sites.

42 **Keywords**

43 Cell cycle; Cyclin-dependent kinases; Short linear motifs (SLiMs); Consensus  
44 sequence motifs; Mass spectrometry; Proteomics; PTMs

45

46 Page Break

47

48 **Introduction**

49

50 Ordered phosphorylation by cyclin-dependent kinases (CDKs) controls the timing and  
51 progression of the cell division cycle. Temporal regulation of CDK phosphorylation is critical,  
52 ensuring that DNA replication origin licensing, DNA replication, and chromosome segregation  
53 occur in sequential order (Gavet and Pines, 2010; Morgan, 1997; Swaffer et al., 2016). CDK1  
54 is essential to embryonic cell division and supports cell division in the absence of interphase  
55 CDKs (CDK2/4/6)(Santamaría et al., 2007). In *S. pombe*, a single cyclin-CDK fusion can drive  
56 a relatively unperturbed cell cycle in optimal growth conditions (Coudreuse and Nurse, 2010).  
57 How temporal ordering of CDK1 phosphorylation is controlled in mammalian cells remains a  
58 major open question.

59

60 Complex formation with a cognate cyclin is requisite to CDK activation. Mammalian genomes  
61 encode four major cell cycle CDKs (CDK1/2/4/6) and ten cyclins  
62 (D1/D2/D3/E1/E2/A1/A2/B1/B2/B3). Mouse knockout studies have elegantly shown the  
63 differential requirements of cyclins and CDKs in embryogenesis and development  
64 (Santamaría et al., 2007; Satyanarayana and Kaldis, 2009). However, detailed biochemical  
65 understanding of how CDK phosphorylation is controlled in mammalian cells is hampered by  
66 redundancy in the cyclin-CDK family and kinase-phosphatase feedback loops (e.g.,  
67 Wee1/Cdc25, Greatwall/PP2A-B55) that can be acutely sensitive to changes in CDK activity  
68 in cells (Hégarat et al., 2020; Lau et al., 2021; Mitra and Enders, 2004; Russell and Nurse,  
69 1986, 1987).

70

71 Cks is a third subunit found in active cyclin-CDK complexes that is conserved from yeast (Suc1  
72 in *S. pombe*) to human. Cks1 acts as a phospho-adaptor protein with selectivity for  
73 phosphothreonine (McGrath et al., 2013). Mammalian genomes encode two Cks proteins  
74 (CKS1B and CKS2), and deletion of both leads to embryonic lethality (Martinsson-Ahlzén et  
75 al., 2008). Cks1 (encoded by CKS1B), but not Cks2, promotes the ubiquitination and  
76 degradation of the CDK inhibitor protein p27<sup>KIP</sup> and promotes cell cycle entry (Ganoth et al.,  
77 2001; Sitry et al., 2002). In *S. cerevisiae*, Cks1 facilitates multisite phosphorylation of the CDK  
78 substrate protein, Sic1 (Köivomägi et al., 2011). Docking of Cks1 onto priming sites is thought  
79 to promote the phosphorylation of low affinity sites by *cdc28* (CDK1 in human) (Köivomägi et

80 al., 2013). It is unclear how many CDK substrates require Cks1 for high occupancy  
81 phosphorylation.

82

83 In *S. pombe*, a quantitative model of CDK1 substrate choice was proposed whereby  
84 substrates with functions in DNA replication have lower thresholds for CDK1 phosphorylation  
85 than substrates with functions in mitosis (Fisher and Nurse, 1996; Stern and Nurse, 1996).  
86 Thus, temporal ordering is achieved by a progressive increase in CDK1 activity. In *S.*  
87 *cerevisiae*, qualitative differences, for example in the Cyclin subunit, confers substrate  
88 specificity to CDK1 (Loog and Morgan, 2005; Örd and Loog, 2019; Örd et al., 2019). Cyclins  
89 E, A, and D have a hydrophobic patch ~35 Å from the catalytic site that has been shown to be  
90 important in substrate recognition by binding to a Cy motif (RXL, where X is any amino acid)  
91 in disordered regions (Adams et al., 1996; Lowe et al., 2002; Schulman et al., 1998; Takeda  
92 et al., 2001). Mutation of the hydrophobic patch significantly reduces phosphorylation  
93 occupancy for a subset of substrates. The hydrophobic patch is not completely degenerate  
94 between cyclins because identical mutations have differential effects on substrate  
95 phosphorylation dependent on the Cyclin subunit (Loog and Morgan, 2005). Additionally,  
96 cyclins are targeted to distinct subcellular compartments (Jackman et al., 2002; Moore et al.,  
97 2002; Toyoshima et al., 1998). This targeting is encoded in nuclear localization and export  
98 sequences that differ between cyclins. Consistent with these results, cyclins have overlapping  
99 and complementary interaction partners in cells (Pagliuca et al., 2011). Cyclins also have non-  
100 redundant functions. Cyclin A2 is essential for mitotic entry and prevents hyperstable  
101 kinetochore-microtubule attachments in early mitosis (Gong et al., 2007; Hégarat et al., 2020;  
102 Kabeche and Compton, 2013). In contrast, cells depleted of Cyclin B proteins progress into  
103 mitosis, but fail to complete proper chromosome segregation (Hégarat et al., 2020).

104

105 CDK1 phosphorylation of individual sites on a substrate protein is ordered to produce  
106 ultrasensitive switches in protein function (Trunnell et al., 2011). However, little is known about  
107 how this order is regulated. Phosphorylation site choice within a substrate is determined by  
108 molecular interfaces proximal to the catalytic site. A structure for Cyclin A-CDK2 in complex  
109 with a peptide substrate shows that a substrate binding cleft formed on one side by the  
110 activation loop imposes a preference for a proline in the +1 position and a basic residue in the  
111 +3 position (Brown et al., 2015; Brown et al., 1999a). These structural studies are consistent  
112 with data from peptide arrays and biochemical assays showing a consensus sequence of  
113 [ST]PX[KR] for *cdc28*, which is a serine or threonine, followed by a proline and a basic residue  
114 (lysine or arginine) in the +3 position (Mok et al.). Compared to CDK2, the activation loop of  
115 CDK1 is more flexible, possibly allowing for a relaxed consensus requirement. Consistent with  
116 this idea, CDK1 phosphorylates synthetic peptides with non-optimal consensus sequences

117 that lack a proline in the +1 position, but only if the peptide contains a RXL motif (Brown et al.,  
118 2015). By contrast, under the same reaction conditions, CDK2 is unable to phosphorylate  
119 these ‘non-canonical’ CDK sites. Non-canonical CDK1 sites have been described for  
120 individual protein substrates and for substrates in mESCs (Kõivomägi et al., 2013; Michowski  
121 et al., 2020; Suzuki et al., 2015). However, it is unknown what proportion of the CDK substrate  
122 phosphorylations are on non-canonical sites, and if and how non-canonical phosphorylations  
123 are regulated.

124

125 Recent advances in mass spectrometry (MS)-based proteomics have enabled quantitative  
126 and comprehensive analysis of cellular protein phosphorylation (Dephoure et al., 2008; Herr  
127 et al., 2020; Olsen et al., 2010). These approaches have produced an extensive catalogue of  
128 phosphorylation sites in human cells that are cell cycle regulated, recently with high temporal  
129 resolution (Ly et al., 2017) . Many cell cycle regulated phosphorylation sites do not match any  
130 known kinase consensus sequence. As an example, 28% of the HeLa mitotic  
131 phosphoproteome do not match a cell cycle kinase consensus motif (CDK: [ST]P, Plk1:  
132 [DE]X[ST][Φ]X[DE], Aurora: [KNR]RX[ST][Φ], where Φ is a hydrophobic residue) (Dephoure  
133 et al., 2008). These sites with no predicted upstream kinase constitute a dark fraction of the  
134 cell cycle regulated phosphoproteome. Interestingly however, the sites are enriched in a motif  
135 consisting of a S/T followed by a K in the +3 position, leading to speculation that there are  
136 unknown kinases that drive a significant fraction of cell cycle regulated phosphorylation  
137 (Dephoure et al., 2008).

138

139 In this study, we developed an *in vitro* approach to investigate how quantitative and qualitative  
140 characteristics of the CDK1 complex contribute to substrate choice and phosphorylation. Fixed  
141 and permeabilized cells are subjected to kinase reactions with recombinant CDK1 in complex  
142 either with Cyclin B, Cyclin A, or Cyclin B-Cks1. We show that both Cyclin A2 and Cks1  
143 promote the phosphorylation of non-proline sites by CDK1 *in vitro*. Cyclin A2-CDK1 non-  
144 proline directed sites are enriched in a lysine in the +3 position (+3K), in a motif defined by  
145 [ST][<sup>^</sup>P]XK, where [<sup>^</sup>P] indicates any residue except for proline. Sites detected *in vitro* are cell  
146 cycle regulated *in vivo*, including non-proline directed sites and sites containing the +3K. By  
147 combining sequential enzymatic reactions on fixed cells, we demonstrate that the majority of  
148 Cks1-promoted sites are primed by CDK1 itself. Based on our data, we propose a model  
149 whereby the cyclin subunit determines substrate specificity, whereas the role of Cks1 is an  
150 enhancer of cyclin-CDK1 activity by promoting multisite phosphorylation of low affinity sites.

151

## 152 **Results**

153



154 *A fixed cell kinase assay to investigate substrate phosphorylation proteome-wide in vitro*

155

156 To investigate the role of the Cks1 and the cyclin subunits in CDK1 substrate phosphorylation,  
157 we designed an *in vitro* kinase assay in which formaldehyde fixed and methanol permeabilized  
158 TK6 cells are incubated with purified CDK1 in complex with either Cyclin B1 (BC), Cyclin B1  
159 and Cks1 (BCC) or Cyclin A2 (AC) (Figure 1A). CDK1 was shown to be sufficient to drive cell  
160 cycle progression in the absence of the interphase CDKs *in vivo* (Santamaría et al., 2007).  
161 Therefore, we used centrifugal elutriation to enrich for cells in the G2&M phases of the cell  
162 cycle (fractions 11 and 12 in Supplementary Figure 1A). In these cells, targets of interphase  
163 CDKs (CDK2/4/6) will be phosphorylated and protein substrates critical to the essential role of  
164 CDK1 in mitotic entry are expressed. Increased phosphorylation on SPXK motifs was  
165 observed after reaction with complexes containing active CDK1, but not a kinase dead CDK1  
166 mutant (CDK1<sup>D146N</sup>, KD) (Figure 1B). Phosphorylation is a readout for two molecular events:  
167 an interaction between the recombinant CDK1 added and the substrate, and catalytic  
168 phosphotransfer. Because cells are fixed, this phosphorylation is direct and not subject to  
169 feedback (e.g., dephosphorylation by phosphatases). We then prepared peptide digests from  
170 the phosphorylated cells using an in-cell digest (Kelly et al., 2022). Peptide digests were  
171 labelled with 16-plex tandem mass tags (TMTs), enriched for phosphorylated peptides,  
172 fractionated offline by HPLC prior to LC-MS/MS analysis (Figure 1A). 3,377 phosphorylation  
173 sites, representing 2,493 proteins, were increased by 2-fold or more compared to KD. Motif  
174 enrichment analysis of significantly changing phosphorylation sites revealed a known  
175 consensus sequence for CDK1 (TPXK) (Figure 1C). In contrast, sites significantly increased  
176 after treatment with Aurora B are enriched in an RRX[ST] motif (Figure 1D). Our results  
177 recapitulate consensus motifs obtained using cell-based assays, indicating that sites identified  
178 in fixed cell assays are specific to the kinase added (Holt et al., 2009; Kettenbach et al., 2011).

179

180 *Cyclin A2 shifts the substrate specificity of CDK1 and promotes the phosphorylation of non-*  
181 *Proline sites in vitro.*

182

183 To investigate how the quality and quantity of CDK1 affects substrate choice, we used the  
184 fixed cell assays described above to measure CDK1 substrate phosphorylation proteome-  
185 wide comparing AC and BC titrated from 2.5 nM to 100 nM recombinant kinase. An upper limit  
186 of 100 nM was chosen based on estimated copies of Cyclin B1 and CDK1 detected in G2&M-  
187 phase leukemic cells (Ly et al., 2014; Wiśniewski et al., 2014). 27,084 phosphorylation sites  
188 were detected, of which 5,113 sites changed by 2-fold or more compared to KD-treated cells  
189 (Supplementary Table 1). This dataset allowed us to investigate how increasing CDK1 activity  
190 quantity affects substrate choice by measuring concentration dependent changes in substrate

191 phosphorylation. On the other hand, with the same dataset, we can investigate how the quality  
192 of CDK1 activity (i.e., the different Cyclin subunit) impacts substrate choice.

193

194 To assess the relative differences between Cyclin A and Cyclin B phosphorylation for the same  
195 site, fold changes were scaled (see Methods) so that the means and standard deviations for  
196 all sites were identical. Scaled fold changes were then normalized for differences in kinase  
197 activity between recombinant kinase preparations (Supplementary Figure 1B). Histone H1  
198 protein has been used extensively to assess specific activity of CDK (e.g., Loog and Morgan,  
199 2005). Normalized, concentration-dependent phosphorylation of histone H1 is  
200 indistinguishable between AC and BC (Supplementary Figure 1C). Thus, any differences  
201 between AC and BC observed in the subsequent analysis are not due to variation in kinase  
202 activity, including specific activity for histone H1, and instead, are due to qualitative differences  
203 conferred by the Cyclin subunit.

204

205 Hierarchical clustering of these data to identify groups of phosphorylation sites that exhibited  
206 similar patterns of phosphorylation. This clustering identified six major clusters of  
207 phosphorylation sites (Figure 1E). Sites in cluster 1 were phosphorylated to a higher extent  
208 with AC compared to BC and therefore Cyclin A-dependent (Figure 1F). Vice versa, sites in  
209 cluster 3 were Cyclin B-dependent (Figure 1G). The observation of equivalently sized clusters  
210 showing either AC, or BC dependence, supports the idea that the phosphorylation patterns  
211 observed are unlikely due to differences in the specific activity of the purified kinases.

212

213 Are there characteristics that distinguish Cyclin A- versus Cyclin B- dependent  
214 phosphorylation sites and substrate proteins? To address this question, we compared clusters  
215 1 and 3 because they show the most extreme differences in cyclin subunit dependence. First,  
216 we assessed the frequency of annotated biological function, subcellular localization gene  
217 ontology terms and UniProt keywords to see if any annotations were differentially enriched  
218 (Figure 1H). Cyclin A-dependent protein substrates were differentially enriched in proteins with  
219 functions in DNA replication, protein translation and proteins localized to the nuclear matrix.  
220 In contrast, Cyclin B-dependent protein substrates were enriched in proteins localized to the  
221 mitotic spindle and centrosomes. Cyclin A- and Cyclin B-dependent substrates were equally  
222 enriched in proteins with functions in mitosis and cell division (Figure 1H, bottom). No  
223 significant difference was observed between Cyclin A- versus Cyclin B-dependent substrates  
224 in whether they contain 1 or more RXL motifs in the same disordered region as the  
225 phosphorylation site (Fisher's exact test,  $p > 0.05$ ).

226

227 Cyclin A-dependent sites show a remarkable depletion of Proline in the +1 position, with only  
228 12% sites being proline-directed (Figure 1I). In contrast, Cyclin B-dependent sites show a  
229 strong +1 Proline (+1P) preference, with 74% sites being proline-directed. (Figures 1J). Cyclin  
230 A-dependent sites contain a prominent enrichment of Lysine at the +3 position (Figure 1I).  
231 64% of Cyclin A-dependent sites meet the S<sup>[^P]</sup>XK motif (Figure 1I). In contrast, 14% of Cyclin  
232 B-dependent sites meet this S<sup>[^P]</sup>XK motif (Figure 1J).

233

234 We conclude that the Cyclin subunit has a major role in subcellular and substrate targeting.  
235 Cyclin A increases the frequency of non-proline directed CDK1 phosphorylation compared to  
236 Cyclin B, and these sites are enriched in S<sup>[^P]</sup>XK sites.

237

238 *Quantitative increases in CDK1 activity alters substrate specificity in vitro*

239

240 Because phosphorylation does not saturate in the range of kinase concentrations tested  
241 (Figure 1E), using scaled (relative) fold changes, we cannot assess whether sites differ in  
242 concentration dependence. For many sites, phosphorylation is not detected in KD-treated  
243 cells, therefore making exact fold changes challenging to accurately estimate. Therefore, to  
244 facilitate comparison of concentration dependence between sites, an arbitrary fold-change cap  
245 was used to enforce phosphorylation saturation *in silico*. A cap of 6.5 was chosen because  
246 this was the mean fold change for phosphorylation sites increased in mitotic versus G2 cells.  
247 This approach enables us to determine if, and at what concentration, the phosphorylation  
248 effectively reaches the mean fold-change observed in the G2 to M transition in cells.

249

250 Using this strategy, we identified seven clusters of phosphorylation sites that differed in BC  
251 concentration-dependence (Figures 2A and B, Supplementary Table 2). Cluster 1 shows fold  
252 changes of 6.5 or more at 2.5 nM, the lowest concentration tested. At the other extreme, sites  
253 in cluster 7 do not reach fold changes of 6.5 or more at 100 nM and follow a linear response  
254 to kinase concentration. Proteins in these clusters were then subjected to functional gene  
255 annotation enrichment analysis. Figure 2C shows selected functional gene ontology (GO)  
256 annotations that show a significant (FDR < 0.01) in one or more clusters. Cluster 1 shows no  
257 major differential enrichment. Interestingly, Cluster 2 shows an enrichment in proteins  
258 associated with protein translation, including ribosomal proteins. Sites with moderate  
259 sensitivity to CDK1 activity (cluster 4), are significantly enriched in proteins involved in DNA  
260 repair and DNA replication. Sites with lower CDK1 sensitivity (cluster 6) are enriched in  
261 proteins involved in the organization of the mitotic spindle, chromosome segregation and  
262 nuclear envelope disassembly. For example, proteins in cluster 6 show a 7.6-fold enrichment  
263 in mitotic spindle assembly proteins, which is three times higher than cluster 1. Similar trends

264 in clustering and functional enrichment are observed with AC (Supplementary Figures 1D, E).  
265 Individual CDK1 substrate proteins may have sites belonging to multiple clusters. Indeed, 943  
266 out of 2,550 CDK1 substrate proteins have phosphorylation sites with differing sensitivities to  
267 CDK1 phosphorylation. CDK1 phosphorylation sites on these substrates represent the  
268 majority of the phosphorylation sites (64%, 3,288 / 5,113). We conclude that quantitative  
269 changes in the activities of Cyclin A-CDK1 and Cyclin B-CDK1 alter substrate specificity in a  
270 similar concentration-dependent manner, with many substrates having multiple CDK1 sites  
271 with differing sensitivity to kinase activity.

272

273 We next assessed if clusters differed in amino acid sequence proximal to the phosphoacceptor  
274 residue. Low and high CDK1 sensitivity clusters showed a similar preference for +1 Proline  
275 (Figures 2D, 2E). Similar results were obtained using Cyclin A-CDK1 (Supplementary Figure  
276 1F). Interestingly, high CDK1 sensitivity sites in cluster 1 have a high proportion of threonine  
277 phosphoacceptor sites (~50%, Figure 2F). In contrast, the proportion of threonine sites (over  
278 serine) is 36% and 23% for CDK1 sites and all detected sites, respectively. Indeed, the  
279 proportion of threonine phosphoacceptor residues is negatively correlated with CDK1  
280 concentration dependence (Figure 2F). These results suggest that threonine residues are a  
281 major target of CDK1 activity in the G2 to M transition.

282

283 In the fixed cell assay, substrate phosphorylation will be determined solely by the forward  
284 kinase reaction. However, in cells, substrate phosphorylation will be subject to antagonism by  
285 cellular protein phosphatases, including PP2A-B55 and PP1, as illustrated in Figure 2G.  
286 PP2A:B55 phosphatase has been shown to prefer dephosphorylating phosphothreonine  
287 residues with a +1 Proline and is active in interphase (Cundell et al., 2016). Could targeted  
288 dephosphorylation by PP2A:B55 *in vivo* lead to lower occupancy of TP sites in fixed G2 cells  
289 and therefore higher CDK1 sensitivity *in vitro*? To address this question, we examined the  
290 endogenous abundance of phosphorylation in G2&M cells, grouped into phosphorylation sites  
291 determined by CDK1 sensitivity by *in vitro* (Figure 2H). Cluster 1 has the highest proportion of  
292 threonine sites and the lowest level of endogenous phosphorylation. Indeed, there is a  
293 negative correlation between CDK1 sensitivity *in vitro* and the median level of endogenous  
294 phosphorylation (Figure 2H). As will be elaborated in the discussion, kinase reactions with G2  
295 cells pre-treated with lambda phosphatase would ensure that all sites have identical  
296 phosphorylation stoichiometry at the start of the kinase reaction. Within a cluster, however,  
297 individual sites range widely in levels of endogenous phosphorylation (Figure 2H), suggesting  
298 that the sensitivity towards CDK1 *in vitro* is unlikely to be driven exclusively by endogenous  
299 occupancy. Does CDK1 sensitivity *in vitro* reflect *in vivo*? To test this, we plotted endogenous  
300 phosphorylation fold changes comparing mitotic and G2 cells because in mitosis, PP2A-B55

301 is inactivated and CDK1 activity is high. Indeed, sites showing the highest sensitivity to CDK1  
302 *in vitro* show the highest fold changes in mitosis (Figure 2I). These data support a model  
303 whereby phosphatase inactivation is the crucial determinant of CDK1 substrate  
304 phosphorylation (Castilho et al., 2009; Krasinska et al., 2011; Mochida et al., 2009; Vigneron  
305 et al., 2009).

306

307 *Cks1 promotes the phosphorylation of non-Proline sites by CDK1 in vitro*

308

309 To assess the role of Cks1 in Cyclin B1-CDK1 interaction with cellular substrates, we titrated  
310 fixed G2&M-enriched TK6 cells with increasing concentrations of either BC or BCC, performed  
311 in biological duplicate. Out of 24,139 sites identified (Supplementary Table 3), 3,377 sites  
312 showed a 2-fold or more increase in phosphorylation upon addition of active CDK1. Note that  
313 the data for BC is identical to that shown in Figure 1. Fold changes were normalized for  
314 differences in CDK1 activity, as above (Supplementary Figure 2A). Individual sites differed in  
315 CDK1 concentration dependence (Figure 3A), and some sites were phosphorylated to higher  
316 extent with BCC compared with BC, and vice versa. Phosphorylation sites were separated  
317 into four clusters by hierarchical clustering. Phosphorylation sites in cluster 2 show strong  
318 enhancement by the Cks1 subunit (Figure 3B). The remaining sites were either  
319 phosphorylated to a greater extent by BC (cluster 4, Figure 3C, 'Cks1-inhibited cluster'), or  
320 equally phosphorylated by BC and BCC (cluster 3). Interestingly, there is a small set of  
321 phosphorylation sites that are highly phosphorylated by BCC at 100 nM kinase (cluster 1).

322

323 How do Cks1-enhanced sites differ from Cks1-inhibited ones? A functional enrichment  
324 analysis was performed comparing clusters 2 and 4. In general, the differences seen between  
325 Cks1-enhanced and Cks1-inhibited substrates (Figure 3D) are less than those observed  
326 between Cyclin A-CDK1 and Cyclin B-CDK1. Splicing factors, however, are a striking  
327 exception, being highly enriched in Cks1-enhanced substrates. Enrichment is also slightly  
328 higher in Cks1-enhanced substrates for proteins localized to the nuclear matrix and with  
329 functions in DNA replication. These results support a model whereby BCC increases  
330 phosphorylation of a subset of BC substrates.

331

332 We next tested if the local amino acid sequence around the phospho-acceptor site in the Cks1-  
333 enhanced cluster (cluster 2) is significantly different from a Cks1-inhibited cluster (cluster 4).  
334 As shown in Figure 3E, Cks1-enhanced sites are depleted of Proline in the +1 position (+1P).  
335 Strikingly, only 27% of Cks1-enhanced sites had a +1P, in contrast to Cks1-inhibited sites, in  
336 which 91% had a +1P (Figure 3F). There is a slight preference for a lysine in the +3 position  
337 (+3K), but less than Cyclin A-dependent sites (Figure 1I). 49% of Cks1-enhanced sites meet

338 a S[<sup>^</sup>P]XK motif. In contrast, only 3% of Cks1-enhanced sites meet this S[<sup>^</sup>P]XK consensus  
339 (Figure 3F). We conclude that Cks1 has a proteome-wide role in promoting CDK1  
340 phosphorylation of non-proline directed sites *in vitro*.

341

342 *Cks1 enhances CDK1 primed-multisite phosphorylation of substrate proteins in vitro.*

343

344 Cks1 has been shown to enhance substrate multisite phosphorylation of the protein substrate,  
345 *S. cerevisiae* Sic1, by phospho-dependent docking to a priming site

346 (Kõivomägi et al., 2013; Kõivomägi et al., 2011). Cks1 was proposed to act as a molecular  
347 ruler, promoting the phosphorylation of a second, lower affinity site 12-15 amino acids C-  
348 terminal to the priming site (Figure 4A). To what extent does phosphate docking play a role in  
349 CDK1 phosphorylation in human cells? And is this role of Cks1 proteome-wide?

350

351 We reasoned that if Cks1 promoted multisite phosphorylation, then Cks1-enhanced protein  
352 substrates should show on average, a higher number of sites phosphorylated by CDK *in vitro*  
353 than Cks1-inhibited substrates. Indeed, protein substrates were exclusively Cks1-enhanced  
354 had on average two CDK1 phosphorylation sites per protein (median), compared with one site  
355 per protein for Cks1-inhibited substrates (Figure 4B). Many proteins had multiple sites, some  
356 that are Cks1-enhanced and others that are Cks1-inhibited. For example, on the protein Ki-  
357 67, 49 sites are phosphorylated by CDK1 in total, of which 24 are Cks1-enhanced. Unlike  
358 Cks1, the Cyclin subunit does not alter multisite substrate phosphorylation (Supplementary  
359 Figure 2B).

360

361 Next, we examined the distribution of secondary phosphorylation sites surrounding a Cks1-  
362 dependent phosphoacceptor site. We reasoned if Cks1 acts as a molecular ruler, we should  
363 observe 'hot spots' of secondary phosphorylation where priming phosphorylation is preferred.

364 In support of this model, secondary phosphorylation sites are enhanced at positions -15 and  
365 +12 for BCC-dependent non-proline sites (Figure 4C). Interestingly, proline-directed CDK1  
366 sites overall do not show this behavior (Figure 4D). The enhancement is seen for both serine  
367 and threonine phosphoacceptor residues, and there is no difference in pattern if the secondary  
368 (putative priming phosphorylation) is restricted to either serine, or threonine. Interestingly,  
369 there is a depletion of secondary phosphorylation sites from positions -8 to +6 for BCC-  
370 dependent non-proline sites compared with proline-directed sites. These results support a  
371 model whereby Cks1 docks onto a proximal priming site to facilitate multisite phosphorylation,  
372 frequently at non-proline directed sites.

373



374 The identity of the major priming kinase for Cks1 is unknown. In *S. cerevisiae*, CDK-Cks  
375 complexes can self-prime to phosphorylate a substrate in a processive manner (Kõivomägi et  
376 al., 2013). Our data suggest that docking can occur either N-terminal or C-terminal to the  
377 phosphoacceptor residue, and that the priming phosphorylation can be either serine or  
378 threonine. However, phosphoproteomic analysis is not at saturation, and the bioinformatic  
379 analysis above cannot distinguish multiple proteoforms of the same protein that differ in  
380 phosphorylation (e.g., two proteoforms each phosphorylated at different sites, or a single  
381 proteoform phosphorylated at both sites).

382

383 Therefore, to directly investigate priming, we designed an experiment applying sequential  
384 phosphatase and kinase reactions on fixed cells. We reasoned that removal of all endogenous  
385 phosphorylation in G2 cells would eliminate priming by all kinases except for the one added  
386 (CDK1). By using a proteome-wide approach, we can identify which Cks1-dependent sites are  
387 dependent on priming by CDK1, or by other kinases (Figure 4E).

388

389 TK6 cells were treated with  $\lambda$  Phosphatase, followed by BCC. Phosphatase pre-treatment  
390 eliminated endogenous SPX[KR] phosphorylation (Figure 4F, lanes 1 and 6), and SPX[KR]  
391 phosphorylation is increased after treatment with BC or BCC (Figure 4F, e.g., compare lanes  
392 2 and 3). Reactions were then analyzed by LC-MS/MS as shown in Figure 1A. 23,911 sites  
393 were identified, of which 5,819 sites were phosphorylated by CDK1 (G2&M cells,  
394 Supplementary Table 4). Sites phosphorylated by CDK1 in mock treated cells were clustered  
395 (Figure 4G) to identify Cks1-enhanced sites (Figure 4G, arrow, and Figure 4H). We then asked  
396 if these sites were phosphorylated by CDK1 in  $\lambda$  phosphatase-treated cells. Of the 1,013 Cks1-  
397 enhanced sites phosphorylated in mock-treated cells, 873 sites showed a 2-fold or higher  
398 change after addition of BCC to  $\lambda$  phosphatase-treated cells compared to KD (Figure 4I). This  
399 result demonstrates that CDK1 has priming activity for most Cks1-dependent sites (86%). The  
400 remaining 140 Cks1-dependent sites cannot be primed by the CDK1 complexes tested, and  
401 are likely to be primed by other kinases, or else mediated by phosphorylation-independent  
402 docking interactions. Interestingly, these experiments, which were carried in biological  
403 duplicate separately from those shown in Fig. 3E, also show that Cks1-dependent sites are  
404 depleted of the +1P and are instead enriched for a +3K (Figure 4J).

405

406 Taken together, our results here have shown that a subset of CDK1 phosphorylation sites lack  
407 the +1 Proline consensus and that phosphorylation of these non-proline directed sites by BCC  
408 is enhanced by the phospho-adaptor protein, Cks1. Cks1-dependent phosphorylation, which  
409 is primed by CDK1 itself *in vitro* promotes the multisite phosphorylation of protein substrates.

410

411 *Cks1- and Cyclin A- dependent phosphorylation sites are cell cycle regulated*

412

413 A crucial question is whether CDK1 phosphorylation observed *in vitro* is also observed in living  
414 cells. The primary function of CDK activity is to drive cell cycle progression via ordered  
415 phosphorylation of substrates, leading to increasing phosphorylation occupancy across the  
416 cell cycle with maximal occupancies observed in mitosis (Swaffer et al., 2016). Therefore, we  
417 hypothesized that if *in vitro* sites are physiologically relevant, they should also be cell cycle  
418 regulated (CCR) *in vivo*. We designed an experiment where cells enriched in different cell  
419 cycle stages were directly compared against fixed cells phosphorylated *in vitro* by CDK1  
420 (Figure 5A). These samples were analyzed together in a single quantitative TMT  
421 phosphoproteomics batch, which minimizes missing values. This internally controlled, relative  
422 quantitation approach enables straightforward and comprehensive comparison between *in*  
423 *vitro* and *in vivo*.

424

425 G1- and G2&M populations were collected using centrifugal elutriation (Supplementary Figure  
426 3A). 9% of cells in the G2&M-enriched fraction were mitotic, judging by Histone H3 S10  
427 phosphorylation (H3pS10). In parallel, cells were arrested in prometaphase using STLC. Fixed  
428 G1 and G2&M-enriched cells were subjected to kinase assays using AC, BC, BCC, and KD,  
429 as above. 23,911 sites were detected in total (Supplementary Tables 5 and 6), representing  
430 5242 protein substrates. 1,514 sites showed 2-fold or more phosphorylation in the G2&M-  
431 enriched sample compared to G1 cells. These sites were deemed interphase CCR (Figure  
432 5A). Similarly, 4,198 sites showed 2-fold or more phosphorylation in STLC-arrested cells  
433 compared to the G2&M population and deemed to be mitotic CCR (Figure 5A). In total, there  
434 were 5,102 sites either mitotic or interphase CCR. 6,924 sites showed 2-fold or more  
435 phosphorylation *in vitro* after incubation with one of the three active CDK1 complexes  
436 compared to samples treated with KD. Of these, 3,912 sites overlapped with either interphase  
437 or mitotic CCR sites (Figure 5B). SPXK phosphorylation in STLC-arrested mitotic cells is more  
438 intense than G2&M-enriched cells subjected to phosphorylation by CDK1 *in vitro*,  
439 demonstrating that the phosphorylation occupancy achieved *in vitro* is at levels below the  
440 maximum achieved physiologically (Supplementary Figure 3B). These data demonstrate the  
441 fixed cell kinase assays phosphorylate sites to physiologically relevant levels, and that a  
442 majority of *in vitro* CDK1 sites (56%) are phosphorylated in a cell cycle regulated manner.

443

444 Sequence analysis of mitotic CCR sites not phosphorylated by CDK1 *in vitro* show a significant  
445 enrichment in motifs consistent with Aurora A/B and acidophilic kinases, including Plk1, Polo-  
446 like Kinases 2/3 and Casein Kinase 2 (CK2) (Figure 5C, top). Interphase CCR sites not

447 phosphorylated by CDK1 *in vitro* show enrichment in acidophilic kinases, but no enrichment  
448 of Aurora A/B motifs. Non-CDK1 interphase CCR sites have a prominent enrichment of an  
449 acidic residue in the -2 position, consistent with a relaxed Plk1 consensus motif (Figure 5D,  
450 top). Both interphase and mitotic sites phosphorylated by CDK1 *in vitro* show an enrichment  
451 of the classic CDK consensus sequence (Figures 4C and 4D, bottom), which is virtually  
452 identical to a similar analysis of all *in vitro* CDK1 sites, including non-CCR sites (Figure 5C).

453

454 Next, we asked whether non-proline directed sites phosphorylated by CDK1 *in vitro* are CCR  
455 in living cells (Figure 5E). Of the 4,198 mitotic CCR sites, 2,413 sites (57%) met a +1P  
456 minimum CDK consensus. Of these +1P CCR sites, 1,975 (82%) were phosphorylated by  
457 CDK1 *in vitro*. Only 100 and 53 of the mitotic CCR sites meet the strict consensus motifs for  
458 Polo-like Kinase 1 (Plk1) and Aurora Kinases ([KR][KR]X[ST]), respectively. The remaining  
459 1,632 non-proline directed mitotic CCR sites, which do not meet any of the motifs described  
460 above, constituted 39% of the total mitotic CCR phosphoproteome. Strikingly, 1,142 of these  
461 non-proline directed mitotic CCR sites, representing 70% of phosphorylation sites with no  
462 predicted upstream cell cycle kinase, are phosphorylated by CDK1 *in vitro*. We therefore  
463 conclude that the majority of non-proline directed mitotic CCR phosphorylation sites can be  
464 directly phosphorylated by CDK1. Taken together, our data show that 3,117 out of 4,198, or  
465 74%, of the mitotic CCR phosphoproteome can be phosphorylated directly by CDK1 (proline  
466 and non-proline directed) (Figure 5E).

467

468 We then examined if there is evidence that Cks1-enhanced and Cyclin A-dependent  
469 phosphorylation sites are CCR. Indeed, Cks1-enhanced sites *in vitro* (Figure 5F and  
470 Supplementary Table 5) constitute 12.6% of the mitotic CCR phosphoproteome, of which 58%  
471 are non-proline directed. These Cks1-dependent, mitotic CCR sites show depletion of a +1P  
472 (Supplementary Figure 3C). We reasoned that because Cyclin A2 is degraded during an  
473 extended prometaphase arrest (Supplementary Figure 3B), Cyclin A2-dependent sites will be  
474 subject to attrition in the STLC-arrested sample. CDK1 can phosphorylate substrates of  
475 interphase CDKs (CDK2/4/6). Therefore, to test if Cyclin A-dependent phosphorylation sites  
476 are also CCR, we performed the fixed cell kinase assay on interphase cells. G1 cells were  
477 phosphorylated with either BC or AC *in vitro*. Hierarchical clustering identified a group of sites  
478 that were phosphorylated *in vitro* in a Cyclin A-dependent manner (Figure 5G and  
479 Supplementary Table 6). These sites represented 9% of the interphase CCR sites and 42%  
480 of these sites matched the [ST][<sup>A</sup>P]XK motif (Figure 5G). Sequence motif analysis of Cyclin A-  
481 dependent, interphase CCR sites show a depletion of a +1P and an enrichment of a +3K  
482 (Supplementary Figure 3D).

483

484 A [ST][<sup>P</sup>]XK sequence motif is enriched among non-proline directed CDK1 sites

485

486 Our data show that both Cks1 and Cyclin A increase the frequency of non-proline directed  
487 sites. Unlike Cyclin A, Cks1 is not targeted for degradation by APC/C-Cdc20 in early  
488 prometaphase, and is found in cells in complex with Cyclin B-CDK1. Interestingly, a pool of  
489 Cyclin B-CDK1 is localized to the kinetochore corona and plays a role in spindle assembly  
490 checkpoint signaling (Allan et al., 2020). We wondered if there was overlap between Cks1-  
491 and Cyclin A-dependent sites because phosphorylation of these sites could be 'handed over'  
492 from Cyclin A-CDK1 (with, or without Cks1) to Cyclin B-CDK1-Cks1 during prometaphase after  
493 Cyclin A is degraded. The overlap between sites reproducibly dependent on Cyclin A (red, N  
494 = 2) and Cks1 (blue, N = 2) is shown in Figure 6A (Supplementary Table 7). 44 sites on 41  
495 proteins were in common. These included sites on Ki-67, MCAK (KIF2C) and Hec1 (NDC80),  
496 which all have functions in regulating chromosome segregation. The [ST][<sup>P</sup>]X[K] motif that  
497 was observed individually for Cks1- and Cyclin A-dependent sites is strongly enriched in these  
498 overlapping sites (Figure 6B) and are found in 39 out of the 44 sites.

499

500 We hypothesized that [ST][<sup>P</sup>]X[K] CDK1 sites would be more susceptible to  
501 dephosphorylation by protein phosphatases active during prometaphase. This is because  
502 PP2A phosphatases show a preference for basic residues C-terminal to the phosphorylated  
503 site (Holder et al., 2020), unlike +1P sites, which are generally strongly disfavored by PP2A-  
504 B56 (Bancroft et al., 2020; Holder et al., 2020; Kruse et al., 2020). To test this hypothesis, we  
505 analyzed a dataset by Holder *et al.* 2020, in which mitotic cells were forced into anaphase by  
506 the addition of the Mps1 inhibitor AZ-3146 (Mps1i) and dephosphorylation measured  
507 proteome-wide by phosphoproteomics (Holder et al., 2020). The mean half-life ( $t_{1/2}$ ) of  
508 [ST][<sup>P</sup>]XK sites is ~17 min, which is significantly shorter than proline-directed sites and non-  
509 proline directed sites in general, which both have an average  $t_{1/2}$  of ~28 min (Figure 6C).

510

511 We conclude that Cyclin A and Cks1 have overlapping phosphorylation sites characterized by  
512 a strong enrichment for a [ST][<sup>P</sup>]X[K] motif. These sites are subject to highly dynamic  
513 regulation and are rapidly dephosphorylated during forced mitotic exit.

514

## 515 Discussion

516

517 Many cell cycle regulated phosphorylations do not meet the reported consensus sequences  
518 for cell cycle kinases, indicating a major gap in our understanding. What are the missing  
519 kinases? The results presented suggest a surprising answer: CDK1. In this study, we showed  
520 that CDK1 can phosphorylate sites that do not match the classic CDK1 consensus sequence.

521 Furthermore, this non-canonical CDK1 phosphorylation is widespread across the cell cycle  
522 regulated phosphoproteome and is regulated by CDK1 subunit composition.

523

524 Using an internally controlled, quantitative phosphoproteomics approach, we demonstrated  
525 the majority of the mitotic cell cycle regulated phosphoproteome (74%, out of 4,198 sites  
526 quantitated) can be directly phosphorylated by CDK1 *in vitro*. To what extent these sites are  
527 targets of direct CDK1 phosphorylation is unknown. Even if a fraction of these sites is  
528 phosphorylated *in vivo* by other kinases, our data suggest that CDK1 can compensate, or  
529 complement the activity of these kinases to phosphorylate these sites in mitosis.  
530 Phosphorylation handover from mTOR kinase to CDK1 has been recently described to  
531 suppress autophagy in mitosis by targeting the same proline-directed sites in ATG13, ULK1,  
532 and ATG14 (Odle et al., 2021). Our data suggest that this handover is likely not limited to  
533 mTOR and other proline-directed kinases, and likely extends to non-proline directed kinases.  
534 To what extent this handover occurs, and how this is regulated is an open question that will  
535 be important to address.

536 Differential substrate targeting is regulated by subcellular localization of Cyclin A and Cyclin B  
537 in living cells (Jackman et al., 2002; Moore et al., 2002). However, in fixed cells,  
538 nucleocytoplasmic transport is inactive and in principle, these complexes have equal access  
539 to cellular substrates. Compared to Cyclin B-CDK1, substrate proteins preferentially  
540 phosphorylated by Cyclin A-CDK1 differ in annotated functions and subcellular localization,  
541 consistent with the observations that substrate targeting is conferred by the Cyclin subunit.  
542 We observed no significant difference in RXL motifs between Cyclin A- and Cyclin B-  
543 dependent substrates, suggesting that there are sequence elements within substrate proteins  
544 encoding for specificity. These additional sequence elements, like the RXL motif, could be  
545 encoded *in cis* (i.e., within the same protein sequence as the phosphoacceptor residue).  
546 Because subcellular organization and protein-protein interactions are largely retained in fixed  
547 cells, it is possible that substrate choice in these assays is determined by interactions *in trans*.  
548 For example, high affinity or avidity interactions between CDK1 complexes with a scaffolding  
549 protein could promote phosphorylation of other substrates proximal in space. Spatial  
550 determinants of substrate phosphorylation are key, for example, in models for the regulation  
551 of kinetochore-microtubule attachments by kinases like Aurora B and Plk1 (Samejima et al.,  
552 2015; Singh et al., 2021).

553

554 We show that substrate specificity *in vitro* is altered by the Cyclin subunit and by CDK1  
555 concentration. Both Cyclin A-CDK1 and Cyclin B-CDK1 show similar concentration-dependent  
556 changes in substrate specificity (Figure 2C, Supplementary Figure 1F). These data suggest  
557 sites with highest sensitivity towards Cyclin B-CDK1 are likely to be also phosphorylated by



558 Cyclin A-CDK1. However, at higher Cyclin-CDK1 concentrations, Cyclin A-CDK1 preferentially  
559 phosphorylates specific sites to a much higher extent (i.e., >6.5-fold, Figure 1E), as compared  
560 with Cyclin B-CDK1, and vice versa. Taken together, these data suggest that in cells, the  
561 differential requirement for Cyclin B versus Cyclin A might only arise for phosphorylations that  
562 require high CDK1 activity. And as a corollary, Cyclin B and Cyclin A might be functionally  
563 redundant for substrate phosphorylation with low CDK1 activity thresholds.

564

565 The *in vitro* experiments show an enrichment for threonine phosphoacceptor residues for  
566 CDK1 (Figure 1C) and we observe a positive correlation between CDK1 sensitivity and  
567 phosphothreonine frequency (Figure 2F). The yeast Cdk1 homologue, *cdc28*, shows a slight  
568 preference for serine over threonine phosphoacceptor residues *in vitro* in peptide assays  
569 (Chen et al., 2014). Human CDK1 is anticipated to have the same preference for serine based  
570 on the conserved DFG+1 residue (Leucine), making phosphoacceptor preference by the  
571 kinase an unlikely explanation for threonine enrichment (Chen et al., 2014).

572

573 An alternative explanation could be differential phosphorylation occupancy of serine and  
574 threonine residues in fixed G2&M cells. The PP2A:B55 phosphatase has been shown to prefer  
575 dephosphorylating phosphothreonine residues with a +1 Proline (Cundell et al., 2016).  
576 PP2A:B55 is active in interphase, inactivated at mitotic entry, and reactivated at mitotic exit.  
577 Consistent with this idea, CDK1 sensitivity is negatively correlated with endogenous  
578 phosphorylation (Figure 2G) and kinase assays on phosphatase treated cells show a  
579 significant reduction in phosphothreonine CDK1 sites (Supplementary Figure 3E). Clusters 1  
580 and 2, which are likely to be most enriched in PP2A:B55 target sites, are not differentially  
581 enriched in proteins with cell cycle functions. This result is consistent with the idea that  
582 PP2A:B55 broadly antagonizes CDK1 activity in interphase (Krasinska et al., 2011).  
583 Interestingly, phosphorylation sites in these two clusters are the most sensitive to CDK1  
584 phosphorylation *in vitro* (Figure 2A) and *in vivo* (Figure 2I), and likely targeted for extensive  
585 dephosphorylation by protein phosphatases (Figures 2F, H). These results suggest that  
586 despite being most sensitive to CDK1 phosphorylation, these sites are not phosphorylated at  
587 appreciable levels due to active interphase phosphatases. The data therefore support a model  
588 whereby phosphatase inactivation being a key driver of CDK1 substrate phosphorylation.

589

590 Using G2&M cells with endogenous phosphorylation for fixed cell assays mimics the context  
591 *in vivo*, where a subset of phosphothreonine-biased CDK1 sites will be targeted for  
592 dephosphorylation by PP2A:B55 and be exquisitely sensitive to phosphorylation when CDK1  
593 activity rises and PP2A:B55 is inactivated at the G2 to M transition. In future, however, it will  
594 be important to measure CDK1 phosphorylation sensitivity in phosphatase pre-treated fixed



595 G2&M cells, which will fully address if quantitative changes in CDK1 is sufficient to enforce  
596 phosphorylation order.

597

598 The fixed cell assays we have developed to understand CDK1 regulation can be extended to  
599 other cellular enzymes that produce a protein mass modification measurable by mass  
600 spectrometry, e.g., ubiquitination. In contrast to *in vitro* assays on cell lysates, it is  
601 straightforward to perform sequential enzymatic reactions on fixed cells. We have capitalized  
602 on this feature of our assays to study the role of priming phosphorylation on CDK1  
603 phosphorylation proteome-wide (Figure 4). Sequential reactions can be used to study  
604 crosstalk between protein post-translational modifications in a highly controlled manner that is  
605 challenging in living cells with active negative and positive feedback mechanisms.

606

607 Several proteins with the [ST][<sup>P</sup>]XK motif have known roles in mitotic regulation, including Ki-  
608 67, BubR1 and MCAK. Ki-67 is localized to mitotic chromosomes and is an important  
609 scaffolding factor to form the mitotic chromosome periphery (Booth and Earnshaw, 2017;  
610 Cuylen-Haering et al., 2020). Ki-67 functions as a biomolecular surfactant, facilitating  
611 chromosome dynamics during mitosis and promoting timely chromosome segregation (Cuylen  
612 et al., 2016). 24 CDK1 phosphorylation sites on Ki-67 are Cks1-dependent (out of 49 CDK1  
613 sites detected in total). Many phosphorylation sites on Ki-67 are Cyclin B-dependent in cells  
614 (Hégarat et al., 2020). Acute depletion of Cyclin B causes loss of Ki-67 at the chromosome  
615 periphery and defects in chromosome segregation (Hégarat et al., 2020). It will be interesting  
616 to test if these effects are Cks1-dependent, as would be predicted from our data.

617

618 Non-proline directed CDK1 phosphorylation has been previously reported (Blethrow et al.,  
619 2008; Michowski et al., 2020). Recently, it was shown that ~30% of direct CDK1  
620 phosphorylation sites were non-proline directed in mESCs (Michowski et al., 2020).  
621 Interestingly, these sites showed an enrichment for a C-terminal basic residue, consistent with  
622 previous reports on individual substrates and the [ST][<sup>P</sup>]XK motif described in our study  
623 (Suzuki et al., 2015). We speculate these sites are especially important for spatial and  
624 temporal regulation in mitosis because they likely require high avidity interactions for  
625 phosphorylation and are exquisitely sensitive to dephosphorylation (Figure 6C), thereby  
626 providing a wide dynamic range for rapidly tuning protein function.

627

628 In this study, we show that the qualitative nature of the CDK1 complex, namely the subunit  
629 composition, has a striking effect on the phosphorylation consensus sequence. The regulated  
630 consensus sequence switch shown in this study highlights the importance of site-level  
631 phosphorylation analysis enabled by mass spectrometry-based phosphoproteomics. CDK1/2

632 substrates are phosphorylated in both interphase and in mitotic cells, but on distinct sites that  
633 have differential impact on protein function. Proteins in the Mcm family (Mcm1-7), which form  
634 the replicative helicase on chromatin to support DNA replication, are excellent examples of  
635 this. *Xenopus laevis* Mcm4 (x/Mcm4) is hyperphosphorylated in mitosis when replicative  
636 helicases are inactive. Complete dephosphorylation of x/Mcm4 prevents chromatin binding,  
637 whereas pre-replicative complexes bound to chromatin are hypo-phosphorylated, i.e.,  
638 showing an intermediate level of phosphorylation between dephosphorylated and  
639 hyperphosphorylated (Pereverzeva et al., 2000). In our analysis, two Mcm4 sites are  
640 detected, T23 and S120, which show high and low sensitivity to CDK1 phosphorylation *in vitro*.  
641 Interestingly, S120 meets the S[<sup>P</sup>]XK consensus sequence for non-proline directed CDK1  
642 phosphorylation, and is highly phosphorylated in mitosis (~84% stoichiometry) (Olsen et al.,  
643 2010).

644

645 Our study provides evidence that these non-proline directed sites are not due to adventitious  
646 binding and instead are likely to have specific functions in cells on the basis of their differential  
647 regulation by CDK1 subunit composition (Figures 1 and 3) and by phosphatases (Figure 6C).  
648 Non-proline directed phosphorylations might be a consequence of long substrate residence  
649 times due to high avidity docking interactions between the non-catalytic subunits (Cyclin,  
650 Cks1) and substrate. In future, it will be important to address the structural and molecular basis  
651 for phosphorylation consensus switching and to assess if this consensus switching is a general  
652 mechanism for kinase regulation.

653

654

## 655 **Acknowledgements**

656

657 We thank members of the Ly, JP Arulanandam, Julie Welburn, Constance Alabert, Julian  
658 Blow and Bill Earnshaw groups for helpful discussions. We thank the FingerPrints  
659 Proteomics Facility and Edinburgh Protein Production Facility for technical support. This  
660 work is supported by a Wellcome Trust and Royal Society Sir Henry Dale Fellowship to T.L.  
661 (206211/Z/17/Z), a Darwin Trust PhD studentship to A. A., a UK Medical Research Council  
662 Programme Grant to J.E. (MR/N009738/1), core funding for the Wellcome Centre for Cell  
663 Biology (091020), a Wellcome Multi-User Equipment Grant to T.L. (218305/Z/19/Z) and a  
664 Wellcome Innovation Award for mass spectrometry equipment (218448/Z/19/Z).

665

## 666 **Author contributions**

667

668 TL: Conceptualization, Supervision, Formal Analysis, Writing – original draft, Funding  
669 acquisition, Investigation, Writing – original draft, Writing – review & editing  
670  
671 AA: Conceptualization, Investigation, Formal Analysis, Methodology, Writing – original draft,  
672 Writing – review & editing  
673  
674 SK: methodology (protein expression and purification), investigation and writing (original  
675 draft)  
676  
677 JE: Conceptualisation, resources, supervision, funding acquisition, writing original draft,  
678 review and editing.  
679

## 680 **Declaration of Interests**

681  
682 The authors declare no competing interests.  
683

## 684 **Figure Legends**

685  
686 **Figure 1. Cyclin A2 promotes non-Proline directed CDK1 phosphorylation and**  
687 **modulates substrate specificity *in vitro*.** (A) Scheme of the *in vitro* kinase assay on fixed  
688 cells, followed by MS-based phosphoproteomics. Cyclin B-CDK1 (BC), Cyclin B-CDK1-Cks1  
689 (BCC), Cyclin A-CDK1 (AC), and a kinase dead mutant of CDK1, Cyclin B-CDK1<sup>D146N</sup>-Cks1  
690 (KD) were compared. (B) Western blot of lysates from fixed cells phosphorylated using the  
691 assay described in (A) with anti-Phospho-SPX[KR] motif antibody, which also cross-reacts  
692 with phosphorylated MAPK motifs, i.e., PXpSP. (C) Motif enrichment analysis of fixed G2&M  
693 cells phosphorylated by either BC or BCC CDK1 complexes. Amino acids shown on top and  
694 bottom are enriched and under-represented, respectively, in kinase phosphorylated sites,  
695 compared to background. The amino acid in position 0 represents the phospho-acceptor  
696 residue. (D) Motif enrichment analysis of fixed G2&M cells phosphorylated by Aurora B. (E)  
697 Fixed G2&M cells were titrated with increasing concentration of either AC or BC, and  
698 subjected to phosphoproteomic analysis. Colour indicates the scaled fold change relative to  
699 KD. (F, G) The mean fold change plotted against the concentration of AC and BC for cluster  
700 1 (F) or cluster 3 (G). Error bars represent the standard deviation. (H) Heatmap showing fold  
701 enrichment for selected gene ontology (GO) terms and UniProt keywords comparing Cyclin  
702 A- vs Cyclin B-dependent phosphorylation sites. (I, J) Motif enrichment analysis of sites from  
703 cluster 1 (I) or cluster 3 (J). Proportion of sites matching +1P (proline-directed, black) or

704 S<sup>[^P]</sup>X[KR] (blue) motifs, where ^P denotes any amino acid besides P and X is any amino  
705 acid.

706

707 **Figure 2. Quantitative increases in CDK1 activity alters substrate specificity *in vitro*.**

708 (A) G2&M cells were titrated with increasing concentrations of KD or BC and subjected to  
709 phosphoproteomic analysis. Heat map showing the capped fold changes against KD.  
710 Hierarchical clustering identified seven clusters. (B) Mean capped fold-change versus CDK1  
711 concentration for each cluster. (C) Scaled fold enrichment for selected enriched gene  
712 ontology terms. (D, E) Motif analysis of sites in Cluster 1 (D) and Cluster 6 (E). (F)  
713 Proportion of serine and threonine phosphoacceptor residues per cluster. (G) Model for the  
714 readout of phosphorylation in fixed cells (kinase sensitivity) versus in viable cells (steady-  
715 state levels, which is subject to kinase-phosphatase antagonism). (H) Normalized  
716 phosphopeptide intensities detected in KD-treated G2&M cells (i.e., the endogenous  
717 phosphorylation in cells) per cluster. Bars indicate medians. (I) Fold-change comparing  
718 mitotic (SLTC-arrested) versus G2&M phase cells per cluster. Bars indicate medians, and  
719 box and whiskers show 75<sup>th</sup>/25<sup>th</sup> and 90<sup>th</sup>/10<sup>th</sup> percentiles, respectively.

720

721 **Figure 3. Cks1 promotes widespread phosphorylation of non-Proline directed sites by**

722 **human Cyclin B-CDK1 *in vitro*.** (A) G2&M cells were titrated with increasing concentrations  
723 of KD, BC or BCC and subjected to phosphoproteomic analysis. Heat map showing the  
724 scaled fold changes against KD. Hierarchical clustering was used to identify Cks1-  
725 dependent (Cluster 2) and Cks1-independent (Cluster 4) phosphorylation sites. (B, C) Line  
726 graphs showing mean fold change for Clusters 2 (B) and 4 (C). Error bars represent the  
727 standard deviation. (D) Heatmap showing fold enrichment for selected gene ontology (GO)  
728 terms and UniProt keywords comparing Cks1-dependent vs Cks1-independent  
729 phosphorylation sites. (E, F) Motif analysis of the sites in Clusters 2 (E) and 4 (F) using  
730 WebLogo. Pie charts show the proportions of sites in the cluster with the indicated motif,  
731 e.g., +1P (black), or S<sup>[^P]</sup>X[KR] (blue), where ^P denotes any amino acid besides P and X is  
732 any amino acid.

733

734 **Figure 4. Cks1 promotes multisite phosphorylation of CDK1 protein substrates.** (A)

735 Model for Cks1 function in CDK1 substrate phosphorylation. (B) Dot plot representing the  
736 number of sites (*y-axis*) phosphorylated on each protein substrate (dot). Only proteins  
737 unique to each cluster are shown. \*\*\*\**p*<0.0001 from a student's *t* test; dotted lines represent  
738 the median. (C, D) The frequency of additional phosphorylation sites detected by  
739 phosphoproteomics within 15 residues of the phosphoacceptor for Cks1-dependent sites  
740 lacking the +1P (C), and CDK1 sites with a +1P (D). (E) Experimental design to investigate

741 priming kinases for Cks1. (F) Western blot with anti-phospho-SPX[KR] motif antibody of  
742 lysates from fixed cells phosphorylated *in vitro* pre-treated either with  $\lambda$  Phosphatase or  
743 mock. This antibody cross-reacts with phosphorylated MAPK motifs, i.e. PXpSP. (G, H)  
744 Heatmap and line graph showing the identification of Cks1-dependent phosphorylation sites  
745 in mock-treated cells. (I) Overlap between sites that show Cks1-dependence in mock-  
746 versus  $\lambda$  Phosphatase-treated cells. (J) Motif enrichment analysis of overlapping sites. Pie  
747 charts show the proportions of sites in the cluster with the indicated motif, e.g., +1P (black),  
748 or S[^P]X[KR] (blue), where ^P denotes any amino acid besides P and X is any amino  
749 acid. Reproducible sites from two biological repeats are shown.

750

751 **Figure 5. Non-proline directed CDK phosphorylation sites *in vitro* are cell cycle**  
752 **regulated in viable cells.** (A) Design of experiment to identify both cell cycle regulated  
753 phosphorylation sites and *in vitro* CDK phosphorylated sites. All samples were combined into  
754 a single TMT analysis to minimize missing values. (B) Overlap between sites phosphorylated  
755 *in vitro* by AC, BC, or BCC, and the cell cycle regulated phosphoproteome. (C) Enriched  
756 motifs for mitotic CCR sites, that were either not phosphorylated by CDK1 *in vitro* (top)  
757 phosphorylated by CDK1 *in vitro* (bottom). (D) Motif enrichment analysis of interphase CCR  
758 sites that did not overlap with CDK1 *in vitro* targets (top) in comparison to that of those that  
759 overlapped (bottom). (E) The proportion of phosphorylation sites in the mitotic regulated  
760 phosphoproteome that can be explained by consensus and direct CDK1 phosphorylation *in*  
761 *vitro*. (F) Heatmap showing mitotic CCR phosphorylation sites that are Cks1-dependent *in*  
762 *vitro* (orange), including non-proline directed sites (exploded pie slice). (G) Heatmap  
763 showing interphase CCR phosphorylation sites that are Cyclin A-dependent *in vitro* (blue),  
764 including sites that meet the S[^P]XK consensus (exploded pie slice).

765

766 **Figure 6. A non-proline directed CDK consensus motif.** (A) Overlap between sites  
767 reproducibly dependent on Cyclin A (red, N = 2) and Cks1 (blue, N = 2). Phosphorylation is  
768 reproducibly enhanced by Cks1, or Cyclin A (compared to Cyclin B-CDK1) for 44 sites (in  
769 purple). Selected substrate proteins that are shown for each. (B) Motif enrichment analysis  
770 of sites in the overlap (purple shaded area) of (A). (C) Dephosphorylation half-lives for  
771 phosphorylation sites detected in Holder et al. 2020 matching the indicated sequence motifs,  
772 including proline-directed motifs ([ST]-P, [ST]-P-X-[KR]), the non-proline directed CDK motif  
773 identified in (B) ([ST]-[^P]-X-[KR]), sites lacking a +1P ([ST]-[^P]) and sites matching the  
774 Aurora consensus ([KR]-[KR]-X-[ST]).

775

776 **Supplementary Figure Legends**

777

778 **Supplementary Figure 1.** (A) Flow cytometry data showing enrichment of cell cycle phases  
779 in fractions collected by centrifugal elutriation. (B) Pre- (left) and post- (right) normalization  
780 scaled fold change comparing AC and BC for all CDK1 phosphorylation sites. (C) Post-  
781 normalization scaled fold changes for histone H1, AC vs BC. (D) Hierarchical clustering  
782 identified seven clusters that have decreasing sensitivity towards CDK1 phosphorylation (1  
783 and 7 being most and least sensitive, respectively). (E) Consensus motif for clusters with  
784 most and least sensitive Cyclin A-CDK1 sites. (F) Heatmap showing selected enriched  
785 functional annotations for each cluster in (D). Colour indicates scaled fold enrichment.

786

787 **Supplementary Figure 2.** (A) Pre- (left) and post- (right) normalization scaled fold change  
788 comparing BC and BCC for all CDK1 phosphorylation sites. (B) Comparison of multisite  
789 phosphorylation between Cyclin A- and Cyclin B-dependent substrates.

790

791 **Supplementary Figure 3.** (A) Flow cytometry data showing enrichment of cell cycle phases  
792 in fractions collected by centrifugal elutriation and STLC mitotic arrest. (B) Immunoblot  
793 analysis of G2&M-phase cells phosphorylated by indicated kinase complexes, in comparison  
794 with STLC-arrested mitotic cells. (C) Motif enrichment analysis of phosphorylation sites that  
795 are Cks1-dependent *in vitro* and mitotic CCR. (D) Motif enrichment analysis of  
796 phosphorylation sites that are Cyclin A-dependent *in vitro* and interphase CCR. (E)  
797 Proportion of phosphothreonine CDK1 sites comparing mock- and lambda phosphatase-  
798 treated G2&M cells phosphorylated with the indicated kinases.

799

## 800 **Supplementary Tables**

801

802 Supplementary table 1: Comparison of AC and BC

803 Supplementary table 2: Titration of CDK1 activity

804 Supplementary table 3: Comparison of BC and BCC

805 Supplementary table 4: Priming phosphorylation for Cks1

806 Supplementary table 5: BCC specific Mitosis regulated sites

807 Supplementary table 6: AC specific interphase regulated sites

808 Supplementary table 7: Overlap between BCC and AC substrates

809

## 810 **STAR Methods**

811

|                   |
|-------------------|
| <i>Antibodies</i> |
|-------------------|



| <b>Name</b>                          | <b>Manufacturer</b>          | <b>Catalogue number</b> | <b>Final concentration</b> |
|--------------------------------------|------------------------------|-------------------------|----------------------------|
| Rabbit anti-Human phospho-SPxK motif | Cell Signalling Technologies | 2325S                   | 1:1000                     |
| Rabbit anti-human Cyclin A2          | Abcam                        | ab32386                 | 1:2000                     |
| Mouse anti-human GAPDH               | Santa Cruz Biotechnology     | sc-365062               | 1:2500                     |
| Mouse anti-human $\alpha$ -Tubulin   | Sigma-Aldrich                | CP06-100UG              | 1:5000                     |
| Mouse anti-human H3pS10              | Cell Signalling Technologies | 29237S                  | 1:1000                     |

812

813

814

815

| <i>Chemicals</i>                    |                          |                         |                            |
|-------------------------------------|--------------------------|-------------------------|----------------------------|
| <b>Name</b>                         | <b>Manufacturer</b>      | <b>Catalogue number</b> | <b>Final concentration</b> |
| Propidium Iodide (PI)               | Sigma-Aldrich            | P4864-10ML              | 50 $\mu$ g/ml              |
| Diamidino phenylindole (DAPI)       | Sigma-Aldrich            | D9542-10MG              | 5 $\mu$ g/ml               |
| S-trityl-L-Cysteine (STLC)          | Sigma-Aldrich            | 164739-5G               | 25 $\mu$ M                 |
| Adenosine triphosphate (ATP)        | Sigma-Aldrich            | A2383-5G                | 10 mM/0.2 $\mu$ M          |
| Tris carboxyethyl phosphine (TCEP)  | Thermo-Fisher Scientific | PG82080                 | 25 mM                      |
| Iodoacetamide                       | Sigma-Aldrich            | I1149-5G                | 25 mM                      |
| Triethylammonium bicarbonate (TEAB) | Sigma-Aldrich            | T7408-100ML             | 100 mM                     |
| Tandem mass tag (TMTpro) 16 plex    | Thermo-Fisher Scientific | A44520                  | 0.25 mg                    |
| Hydroxyl amine                      | Thermo-Fisher Scientific | 90115                   | 5%                         |
| Acetonitrile                        | Thermo-Fisher Scientific | A955-1                  | 80-99.9%                   |
| Methanol                            | Fisher Scientific        | 11976961                | 20-90%                     |
| Formic acid                         | Thermo Fisher Scientific | 28905                   | 0.5-2%                     |

|                                           |                          |               |                   |
|-------------------------------------------|--------------------------|---------------|-------------------|
| Acetic acid                               | Thermo Fisher Scientific | A11350        | 0.50%             |
| Trifluoroacetic acid (TFA)                | Sigma-Aldrich            | 302031        | 0.1-5%            |
| ammonium hydroxide                        | Sigma-Aldrich            | 338818-100ML  | 1%                |
| Ammonium formate                          | Sigma-Aldrich            | 78314-100ML-F | 10%               |
| Glycolic acid                             | Sigma-Aldrich            | 420581-100ML  | 5%                |
| cCOMPLETE protease inhibitor cocktail     | Sigma-Aldrich            | 11836170001   | x1                |
| Phosphatase inhibitor cocktail (PhosSTOP) | Roche                    | 4906837001    | x1                |
| Trypsin protease                          | Thermo-Fisher Scientific | 90058         | 1:20*             |
| Benzonase                                 | EMD Millipore            | 70664-10KUN   | 5 U               |
| MagReSyn® Ti-IMAC                         | 2BScientific             | MR-TIM005     | 1:4 peptide:beads |
| HisPur™ Ni-NTA Superflow Agarose          | Thermo Fisher Scientific | 25214         |                   |

816

| <i>Cell culture medium supplements and reagents</i> |                     |                         |                            |
|-----------------------------------------------------|---------------------|-------------------------|----------------------------|
| <b>Name</b>                                         | <b>Manufacturer</b> | <b>Catalogue number</b> | <b>Final concentration</b> |
| Dulbecco's Modified Eagle Medium (DMEM)             | Life Technologies   | 10565018                | x1                         |
| Roswell Park Memorial Institute (RPMI)              | Life Technologies   | 61870010                | x1                         |
| Dulbecco's phosphate buffered saline (DPBS)         | Life Technologies   | 14190250                | x1                         |
| Fetal bovine serum                                  | Life Technologies   | 10270106                | 1-10%                      |
| Insect-Xpress insect cells medium                   | Lonza               | BELN12-730Q             |                            |
| GeneJuice® Transfection reagent                     | Merck Millipore     | 70967                   |                            |

817

| <b>Columns/instruments:</b>           |                     |                         |
|---------------------------------------|---------------------|-------------------------|
| <b>Name</b>                           | <b>Manufacturer</b> | <b>Catalogue number</b> |
| Elutriation chamber                   | Beckman-Coulter     | 356943                  |
| Sep-Pak 50 mg C <sub>18</sub> columns | Waters              | WAT054955               |

|                                                    |                   |           |
|----------------------------------------------------|-------------------|-----------|
| NEST micro-spin C <sub>18</sub> columns            | Harvard Apparatus | 74-4601   |
| HPLC 1 mm, 13 µm BEH resin C <sub>18</sub> columns | Waters            | 186002346 |
| 24 ml Superdex 75 10/300 gel filtration column     | Cytiva            | 29148721  |
| 53 ml Sephadex G-25 HiPrep 26/10 desalting column  | Cytiva            | 10470505  |
| ÅKTA PURE chromatography system                    | Cytiva            |           |

818

| <b>Bacterial and virus strains</b>   |            |           |
|--------------------------------------|------------|-----------|
| <i>E. coli</i> DH5α                  | Invitrogen | 18265-017 |
| <i>E. coli</i> Rosetta2 (DE3) pLYS-S | Novagen    | 709564    |

819

| <b>Recombinant DNA</b>                              |                            |  |
|-----------------------------------------------------|----------------------------|--|
| pVL1393 Human CDK1                                  | Brown <i>et al.</i> , 2015 |  |
| pET28-a Human cyclin B1(165-433), C167S/C238S/C350S | Petri <i>et al.</i> , 2007 |  |
| pET3-d Bovine cyclin A2 (170-430)                   | This paper                 |  |
| pGEX6P-1 Human CKS1 (5-79)                          | This paper                 |  |

820

821

### 822 *Cell culture and centrifugal elutriation*

823

824 TK6 cells were seeded at 80,000 cells/ml in 50 ml of Roswell Memorial Park Institute (RPMI)

825 tissue culture medium supplemented with 10% Fetal Bovine Serum (FBS) in eight 15 cm

826 dishes. After 48 hours, cells were centrifuged, pooled, washed once in Dulbecco's

827 Phosphate Buffered Saline (DPBS), and resuspended in 1% Formaldehyde. Cells were

828 mixed on a rotator at room temperature for 10 mins. Cells were washed in DPBS and

829 permeabilized in 90% Methanol for a minimum of 24 hours at -20 °C. For centrifugal

830 elutriation, methanol was removed, and cells were resuspended in elutriation buffer (5 mM

831 MES, 100 mM NaCl, 1% FBS) and placed in elutriation chamber fitted into ultra-centrifuge.

832 Cells were trapped in the elutriation chamber at 2010 rpm and 15 ml/min flow driven by a

833 peristaltic pump. Cell size fractions were collected by progressively increasing the flow rate

834 up to 35 ml/min. The cell cycle phase distribution of each elutriation fraction was analyzed by

835 staining cells with propidium iodide (50 µg/ml RNase A, 50 µg/ml Propidium Iodide in DPBS)

836 for 30 mins prior to flow cytometry analysis. Fractions were combined in DPBS

837 supplemented with 1x Roche phosphatase inhibitor cocktail to obtain pooled fractions

838 enriched in either 2N or 4N DNA content. A sample of cells was immunostained with

839 H3S10ph antibody conjugated to Phycoerythrin (PE) for 30 mins. Cells were washed once

840 and resuspended in flow buffer containing 5 µg/ml DAPI. To arrest cells in mitosis, TK6 cells  
841 were seeded at 800,000 cell/ml in RPMI supplemented with 10% FBS and 25 µM STLC.  
842 After 16 hours, cells were then harvested, fixed and permeabilized as described above.

843

#### 844 *Protein expression and purification*

845

846 Full-length human CDK1 was expressed in insect cells from pVL1393 as a 3C-protease  
847 cleavable GST fusion, which leaves a short cloning artefact (GPLGS) at the N terminus. This  
848 construct was expressed, purified and phosphorylated (using GST-CAK1) as previously  
849 described (Brown et al., 2015; Brown et al., 1999b). T161 phosphorylated CDK1 was then  
850 purified from GST-CAK1 by size exclusion column chromatography on a Superdex 75 26/60  
851 column equilibrated in 50 mM Tris pH7.5, 150 mM NaCl, 0.5 mM TCEP. Human cyclin B1,  
852 residues 165–433 carrying the C167S/C238S/C350S mutations, was expressed in  
853 recombinant *E. coli* cells and purified as described exploiting the thrombin-cleavable hexa-  
854 histidine tag encoded by the pET28-a (+) vector (Petri et al., 2007). Human Cks1 was  
855 expressed from pET21a in *E. coli* cells and purified as described (Brown et al., 2015).  
856 Bovine cyclin A2, residues V170-V430 was expressed in *E. coli* Rosetta2 (DE3) pLYS-S  
857 cells as a GST-fusion from a modified pET3-d vector. It was purified by affinity purification  
858 followed by 3C cleavage to remove the GST tag and then a subsequent size-exclusion  
859 chromatography step (Superdex 200 16/60 column). The bovine cyclin A2 has the GPLMKY  
860 sequence at the N-terminus as a cloning artefact following 3C cleavage. As previously  
861 described (Brown et al., 1995), bovine cyclin A2 was purified in buffer containing MgCl<sub>2</sub> (300  
862 mM NaCl, 100 mM MgCl<sub>2</sub>, 50 mM Tris-HCl, pH 8.0, 1 mM DTT) to help prevent aggregation.

863

864 To prepare the binary T161pCDK1-cyclin B1 and ternary T161pCDK1– cyclin B1-CKS1  
865 complexes, components were individually purified and then mixed in molar excesses of  
866 cyclin B1 and CKS1 over CDK1 as required, and essentially as described (Brown et al.,  
867 2015). The interaction between CDK1 and cyclin B1 is dependent on the concentration of  
868 salt in the buffer. In each case, the final step to assemble the complex was carried out on a  
869 Superdex 75 HR26/60 SEC column equilibrated in modified Tris-buffered saline containing  
870 1.0 M NaCl, 50 mM Tris-HCl, pH 8.0, 1 mM DTT. T161pCDK1-cyclin A2 was prepared by  
871 mixing purified phosphorylated CDK1 with an excess of purified bovine cyclin A2 and  
872 separating the complex by size exclusion chromatography on a Superdex 75 HR26/60  
873 column equilibrated in 50mM Tris pH 8.0, 200mM NaCl, 1mM DTT. For each purification,  
874 fractions containing the desired complex were pooled and concentrated to circa 10–12 mg  
875 ml<sup>-1</sup> by ultrafiltration and then fast frozen in aliquots in liquid nitrogen before storage at -80  
876 °C.

877

878 A recombinant complex comprised of a truncated Aurora B (55-344) and the C-terminus of  
879 INCENP (835-903) was expressed and purified from bacterial cells. To co-express these  
880 proteins, Escherichia coli Rosetta cells were co-transformed with plasmids carrying the open  
881 reading frame sequences of both the truncated INCENP and the truncated, N-terminally 6x  
882 Histidine-SUMO tagged, Aurora B and grown on LB agar plate (Supplemented with  
883 Kanamycin, Chloramphenicol and Spectinomycin antibiotics). Cultures were scaled up and  
884 grown at 37°C by inoculating 20 ml of cells from a dense bacterial suspension into 2 Litres of  
885 LB growth medium supplemented with the antibiotics described above. Once bacterial cells  
886 reached a density of approximately 0.5 OD, the temperature was decreased to 18°C, and the  
887 expression was induced by adding 350 µM IPTG for 18 hours. Cells were then pelleted and  
888 lysed with a bio-disruptor in lysis buffer (25 mM HEPES, 500 mM NaCl, 25 mM Imidazole, 2  
889 mM β-mercaptethanol, 1 x cCOMPLETE protease inhibitor cocktail and 50 U Benzonase; pH  
890 7.5). To pull down the expressed Aurora B complex, supernatant containing the soluble  
891 proteins was collected by spinning lysates at 22,500 rpm for 50 mins at 4°C and incubated  
892 with Nickel coated silica beads for 2 hours at 4°C. To remove non-specifically bounds  
893 proteins, washes with lysis buffer, chaperone buffer (25 mM HEPES, 1000 mM NaCl, 30 mM  
894 Imidazole, 50 mM KCl, 10 mM MgCl<sub>2</sub>, 2 mM ATP and 2 mM β-mercaptethanol; pH 7.5) then  
895 a low salt buffer (25 mM HEPES, 200 mM NaCl, 25 mM Imidazole and 2 mM β-  
896 mercaptethanol; pH 7.5) were carried out by resuspending beads in each and centrifugation  
897 at 500 g for 5 mins at 4°C. To elute the Aurora B complex, beads were dipped in Imidazole  
898 elution buffer (25 mM HEPES, 200 mM NaCl, 500 mM imidazole, 2 mM β -mercaptethanol)  
899 for 2 hours at 4°C then centrifuged as described above. This was followed by four rounds of  
900 resuspension then centrifugation in the Imidazole elution buffer and pooling of the eluent. To  
901 cleave the 6x Histidine-SUMO tag from the recombinant Aurora B complex, samples were  
902 first passed through a 50 ml pre-packed desalting column fitted on ÄKTA liquid  
903 chromatography instrument and fractionated in a dialysis buffer (25 mM HEPES, 200 mM  
904 NaCl and 2 mM β-mercaptethanol; pH 7.5) to remove the Imidazole. Desalted proteins were  
905 then incubated overnight at 4°C with the protease SENP2 to cleave the tag. To purify the  
906 Aurora B complex, samples were concentrated to 300 µl and loaded into a pre-packed, 24  
907 ml Superdex 75 10/300 gel filtration column fitted on ÄKTA instrument in gel filtration buffer  
908 (25 mM HEPES, 200 mM NaCl, 4 mM Dithiothreitol [DTT] and 5% Glycerol; pH 7.5).  
909 Fractions containing the two subunits of the recombinant complex were identified by SDS-  
910 PAGE, snap frozen in liquid nitrogen and stored at -80°C until the *in vitro* kinase assays.

911

912 *In vitro* kinase assays on fixed cells

913

914 To induce protein phosphorylation *in vitro*, 2 million fixed and permeabilized TK6 cells from  
915 the pooled elutriation fractions above were blocked in 40 mM Tris (supplemented with 5%  
916 BSA and 1x Roche phosphatase inhibitor cocktail) for 10 mins. Cells were then washed by  
917 centrifugation at 15,000 g for 30 secs and placed in 400 µl of phosphorylation master-mix  
918 (40 mM Tris, 0.5% BSA, 10 mM ATP, 1x Roche phosphatase inhibitor cocktail and  
919 recombinant CDK1 complexes) for 40 mins at room temperature. For phosphorylation with  
920 Aurora B, cells were blocked in DPBS (Supplemented with 5% BSA and 1x Roche  
921 phosphatase inhibitor cocktail) for 10 mins on ice then placed in a master-mix (DPBS, 0.5%  
922 BSA, 10 mM ATP, 1x Roche phosphatase inhibitor cocktail and recombinant Aurora B) for  
923 40 mins at 37°C. To stop the phosphorylation reactions, cells were quenched by washing  
924 three times with 11 mM EDTA in either 40 mM Tris (Supplemented with 0.5% BSA) for  
925 assays with CDK1 or in DPBS (Supplemented with 0.5% BSA) for assays with Aurora B.  
926 Cells were then resuspended in 300 µl of ice cold DPBS containing 1x Roche phosphatase  
927 inhibitor cocktail. To check the *in vitro* phosphorylation by Western blotting, 200 µl of this  
928 suspension was placed in a new tube, centrifuged and pellets were resuspended in 70 µl cell  
929 extraction buffer (1 mM HEPES, 10 µM EDTA, 2% SDS, 1x cCOMPLETE protease inhibitor  
930 cocktail and 1x Roche phosphatase inhibitor cocktail). Extracts were then sonicated for 30  
931 secs at 10% amplitude, and crosslinking was reversed by heating at 95°C for 50 mins.  
932 Proteins in the lysates were then reduced by adding 25 mM TCEP and mixed with 25 µl of  
933 LDS sample buffer for loading. Proteins were separated by SDS-PAGE at 150 V in 1x  
934 NuPAGE MES Running Buffer for 2 hours and transferred onto 0.2 µm nitrocellulose  
935 membranes at 0.2 A in 80% NuPAGE MES buffer + 20% methanol (v/v) for 2  
936 hours. Membranes were stained overnight with anti-phospho-SPxK motif and anti-Tubulin  
937 antibodies in Tris buffered saline (TBS, Supplemented with 5% BSA) at 4°C. This was done  
938 after blocking with TBS (Supplemented with 5% milk) for a minimum of 1 hour. To remove  
939 the primary antibodies, membranes were washed three times with TBS-T (TBS and 0.1%  
940 Tween) for 5 mins each. Secondary antibodies conjugated to IRDye680 or IRDye800 in TBS  
941 (Supplemented with 5% BSA) were then added for 1-2 hours at room temperature and  
942 bands were visualized by scanning the membranes with Li-COR Odyssey instrument.

943

#### 944 *Sample preparation for TMT phosphoproteomic analysis of fixed cells*

945

946 To prepare peptide digests from fixed cells, 100 µl of cells from above were washed by  
947 centrifugation, resuspended in digestion buffer, which consisted of: 100 mM triethyl  
948 ammonium bicarbonate (TEAB), 2 mM MgCl<sub>2</sub> and 5 U Benzoylase; pH 8.5. Nucleic acids  
949 were digested at 37°C for 30 mins (Kelly et al., 2022). Proteins were then digested by adding  
950 1.25 µg Trypsin protease for 16 hours at 37°C followed by another addition of 1.25 µg trypsin



951 for 4 hours. Peptides were then acidified by adding formic acid to a final concentration of 2%  
952 and desalted using NEST C<sub>18</sub> micro-spin columns. Briefly, peptides were bound to C<sub>18</sub>  
953 columns that were previously conditioned with 100% acetonitrile and equilibrated with 0.5%  
954 formic acid. Columns were then washed twice with 0.5% formic acid and peptides were  
955 eluted with 80% acetonitrile diluted in 0.5% formic acid. To remove solvent, samples were  
956 dried at 30°C until fully dry. Peptides were resuspended in 50 µl of 100 mM TEAB and mixed  
957 with 0.25 mg of TMTpro from a set of 16 plex resuspended in 10 µl acetonitrile for 1 hour.  
958 The isobaric labelling reaction was then quenched by adding 2.5 µl of 5% hydroxylamine to  
959 these samples for 15 mins at 37°C. Peptides from samples in the following experiments were  
960 pooled together: AC/BC titration experiment discussed in Figures 1 and 2; BCC and BC  
961 titration experiment in Figure 3. The experiment involving λ Phosphatase pre-treatment of  
962 fixed cells in Figure 4 was pooled in the same TMT set with samples for CCR sites  
963 identification discussed in Figure 5 and the identification of mitotic CCR sites that were Cks1  
964 dependent was done with the same samples used for identifying the priming phosphorylation  
965 kinase in Figure 4. Peptides from each pool were then dried, resuspended in 0.5% formic  
966 acid, and divided into two fractions each was desalted in a 50 mg Sep-Pak C<sub>18</sub> column. To  
967 remove free TMT from samples, an extra wash with 0.5% acetic acid was added to the  
968 protocol and elution was done in 80% acetonitrile, this time diluted in 0.5% acetic acid.  
969 Samples were phosphoenriched by mixing peptides with 3.2 mg of MagReSyn® Ti-IMAC in  
970 load buffer, which consisted of 80% acetonitrile, 5% trifluoroacetic acid (TFA) and 5%  
971 glycolic acid, for 20 mins at 25°C. Beads were washed for 2 min with 80% acetonitrile + 1%  
972 TFA. This was followed by two 2 min washes in 10% acetonitrile + 0.2% TFA.  
973 Phosphorylated peptides were eluted in 1% ammonium hydroxide for 15 mins twice in  
974 elution buffer. This was followed by a second elution for 1 hour in a 50/50 mix of 1%  
975 ammonium hydroxide and acetonitrile (v/v). To increase the number of phosphorylated  
976 peptides identified, the flow through was dipped in a new batch of MagReSyn® Ti-IMAC  
977 beads and the phospho-enrichment step was repeated as described above. 5% of the  
978 pooled peptides were kept without phospho-enrichment for total proteome analysis. To  
979 remove any residual magnetic beads, peptides were dried and desalting with NEST micro-  
980 spin C<sub>18</sub> columns was performed as described above. For deep phosphorylation analysis,  
981 peptides were fractionated using high pH reverse phase HPLC. Briefly, peptides were  
982 passed through a 1 mm column packed with 13 µm sized BEH silica resin coated with C<sub>18</sub>  
983 and were eluted with a gradient of 15 – 80% B, with the following A and B mobile phases: 10  
984 mM ammonium formate pH 9.3, 10/90 mixture of 10 mM ammonium formate pH 9.3 and  
985 100% acetonitrile. Peptides were eluted into 16 wells, dried and stored at -20°C until data  
986 acquisition by mass spectrometry.  
987

988

989 *Proteomics data analysis*

990

991 In the kinase assay where phosphorylation by BC was compared to BCC described in Figure  
992 1, the TMTpro labelled and phosphoenriched samples were analyzed using Dionex Ultimate  
993 3000 HPLC-Coupled Tribrid Fusion Lumos mass spectrometer. Samples were loaded and  
994 separated using 75  $\mu\text{m}$   $\times$  50 cm EASY-Spray column with 2  $\mu\text{m}$  sized particles, which was  
995 assembled on an EASY-Spray source and operated constantly at 50°C. Two mobile phases  
996 were used to separate the peptides: Phase A consisting of 0.1% formic acid in LC-MS grade  
997 water and phase B consisting of 80% acetonitrile and 0.1% formic acid. Peptides were  
998 loaded onto the column at a flow rate of 0.3  $\mu\text{L}/\text{min}$  and eluted at a flow rate of 0.25  $\mu\text{L}/\text{min}$   
999 according to the following gradient: 2 to 40% mobile phase B in 120 min and then to 95% in  
1000 11 min. Mobile phase B was retained at 95% for 5 min and returned back to 2% a minute  
1001 after until the end of the run (160 min in total for each fraction). A voltage of 2.2 kV was set  
1002 when spraying this gradient of peptides into the front end of the mass spectrometer at ion  
1003 capillary temperature of 280°C with a maximum cycle time of 3 secs. An MS1 scan at a  
1004 resolution of 120,000 in Orbitrap detector was performed with a maximum injection time of  
1005 50 msec and the top 10 most abundant ions within a scan range of 380-1500 m/z based on  
1006 the m/z signal with charge states of 2-6 from that scan were chosen for fragmentation in a  
1007 HCD cell at 28%. This was followed by a rapid MS2 scan on a linear ion trap for peptide  
1008 identification with a maximum injection time of 50 msec. To minimize the TMTpro reporter  
1009 ion ratio distortion, 5 precursor fragments were selected for a synchronous precursor  
1010 selection (SPS) MS3 method from 3 precursor dependent scans (McAlister et al., 2014).  
1011 These fragments were further fragmented at 55% collision energy in a HCD chamber and  
1012 analyzed using an Orbitrap detector at a resolution of 55,000 with a 90 msec maximum  
1013 injection time. The samples from this experiment that were not phosphoenriched were  
1014 analyzed for total proteome analysis using the same method, except that the MS2  
1015 fragmentation was performed in a CID cell at 35% energy.

1016

1017 In the experiment where AC and BC phosphorylation of fixed cells was compared (Figure 3),  
1018 both total and phosphorylated peptides were loaded into a trap column (100  $\mu\text{m}$   $\times$  2 cm,  
1019 PepMap nanoViper C18 column, 5  $\mu\text{m}$ , 100 Å) attached to a Dionex Ultimate 3000 RS  
1020 system in 0.1% TFA for 3 mins and then separated through analytical column (75  $\mu\text{m}$   $\times$  50  
1021 cm, PepMap RSLC C18 column, 2  $\mu\text{m}$ , 100 Å) in the following mobile phases: 0.1% formic  
1022 acid (Solvent A) and 80% acetonitrile + 0.1% formic acid (Solvent B). Separation was carried  
1023 out using a linear solvent gradient of 5% to 35% for 130 mins followed by a steep gradient to  
1024 98% up until 152 mins after which the solvent concentration was dropped back to 5%. The

1025 separation was carried out at a flow rate of 300 nl/min. Peptides were then sprayed into the  
1026 front end of a Tribrid Fusion mass spectrometer through a nanoelectrospray ionizer with a  
1027 cycle time of 3 secs and the MS1 data for precursor ions were acquired in an Orbitrap  
1028 detector at a resolution of 120,000. The top 10 most abundant peaks with charge states of 2-  
1029 6 were then fragmented in a HCD chamber at 28% and analyzed on a linear ion trap for  
1030 peptides identification in a maximum injection time of 70 msec. A neutral loss that matches  
1031 the molecular weight of the phosphate group (98 m/z) was set to identify phosphorylated  
1032 peptides. SPS MS3 was then performed on the top 5 precursor fragments from 5 precursor  
1033 dependent scans following HCD fragmentation (58%) in Orbitrap detector at a resolution of  
1034 50,000 with a maximum injection time of 110 msec.

1035

1036 Finally, phosphorylated and total samples that involved sequential reactions with  
1037 phosphatase and CDK1 described in Figure 2 and those used for the analysis of CDK1 CCR  
1038 sites described in Figure 4 were labelled with TMTpro and pooled into the same set and  
1039 analyzed on an Orbitrap Eclipse mass spectrometer. Peptides were initially trapped in  
1040 PepMap nanoViper C18 column (100  $\mu\text{m}$   $\times$  2 cm, 5  $\mu\text{m}$ , 100  $\text{\AA}$ ) in 0.1% TFA for 5 mins then  
1041 fractionated with analytical PepMap RSLC C18 column (75  $\mu\text{m}$   $\times$  50 cm, 2  $\mu\text{m}$ , 100  $\text{\AA}$ ) on a  
1042 Dionex Ultimate 3000 RS system with a 5%-35% gradient for 130 mins. This was followed  
1043 by a steep increase in solvent concentration to 98% for up to 152 mins then a drop to 5% for  
1044 1 min. peptides from the gradient were injected into the front end of a Tribrid Eclipse mass  
1045 spectrometer through a nanoelectrospray ionizer in a 3 secs cycle time. Precursor ions were  
1046 detected in a master scan using Orbitrap detector at a resolution of 120,000 with a maximum  
1047 injection time of 50 msec. Precursor ions with top 10 signals and charge states of 2-7 were  
1048 selected for fragmentation using HCD (28%) and analyzed by a linear ion trap with a  
1049 maximum injection time of 50 msec. SPS-MS3 of 5 fragments from 5 precursor dependent  
1050 runs were fragmented by HCD (55%) and analyzed by Orbitrap at a resolution of 50,000 with  
1051 a maximum injection time of 90 msec.

1052

1053 Raw data from the assays on fixed cells were processed on MaxQuant version 1.6.14 (Cox  
1054 and Mann, 2008). To normalize the data, reporter intensities for histone proteins detected in  
1055 all TMTpro channels in the Protein Groups file were summed. Summed intensities were  
1056 used to normalize the reporter ion intensities for sites in the corresponding TMTpro channels  
1057 in the PhosphoSTY file to adjust for mixing error. The fold change in phosphorylation  
1058 intensity for each site was then calculated by dividing the normalized reporter ion intensity of  
1059 that site in the sample treated with the active recombinant kinase by its normalized reporter  
1060 ion intensity in the control sample. Sites with at least 2-fold increase in their phosphorylation  
1061 were considered *in vitro* phosphorylated. To perform clustering based on the

1062 phosphorylation pattern, the fold change for each site in a particular channel was scaled, i.e.  
1063  $(x - \bar{x}) / s$ , where  $s$  is the sample standard deviation and  $\bar{x}$  is the sample mean. Data were  
1064 then plotted on a heat map and sites with missing values were eliminated. K-means  
1065 clustering was then used to segregate sites with similar phosphorylation changes into  
1066 clusters. Regular expressions were used to grep sites with certain amino acid sequences,  
1067 such as those with or without a +1 Proline or those without a +1 Proline but with a +3 Lysine.  
1068 To perform motif enrichment analysis, sequences of each cluster were inserted into the  
1069 online tool WebLogo and plots generated were used in the results section presented here  
1070 (Crooks et al., 2004). For motif enrichment analysis with IceLogo, the sequences in the  
1071 cluster of interest were inserted as the positive set and sites in either the rest of the heat  
1072 map or in the rest of the phospho-proteome were inserted as the background (Colaert et al.,  
1073 2009). To match the CCR sites with the *in vitro* data, a column containing the gene name,  
1074 the phosphorylated residue, and the location of that residue in the protein was added to the  
1075 two tables. Rows with matching data in that column in both tables were considered *in vitro*  
1076 targets of CDK1 with CCR endogenous phosphorylation.

1077

## 1078 **Supplementary information**

1079

## 1080 **References**

1081

- 1082 Adams, P.D., Sellers, W.R., Sharma, S.K., Wu, A.D., Nalin, C.M., and Kaelin, W.G. (1996).  
1083 Identification of a cyclin-cdk2 recognition motif present in substrates and p21-like cyclin-  
1084 dependent kinase inhibitors. *Molecular and Cellular Biology*.
- 1085 Allan, L.A., Camacho Reis, M., Ciossani, G., Huis in 't Veld, P.J., Wohlgemuth, S., Kops,  
1086 G.J., Musacchio, A., and Saurin, A.T. (2020). Cyclin B1 scaffolds MAD 1 at the kinetochore  
1087 corona to activate the mitotic checkpoint *EMBO J*.
- 1088 Bancroft, J., Holder, J., Geraghty, Z., Alfonso-Pérez, T., Murphy, D., Barr, F.A., and  
1089 Gruneberg, U. (2020). PP1 promotes cyclin B destruction and the metaphase-anaphase  
1090 transition by dephosphorylating CDC20. *Mol Biol Cell* *31*, 2315-2330.
- 1091 Blethrow, J.D., Glavy, J.S., Morgan, D.O., and Shokat, K.M. (2008). Covalent capture of  
1092 kinase-specific phosphopeptides reveals Cdk1-cyclin B substrates. *Proceedings of the*  
1093 *National Academy of Sciences of the United States of America*.
- 1094 Booth, D.G., and Earnshaw, W.C. (2017). Ki-67 and the Chromosome Periphery  
1095 Compartment in Mitosis. *Trends in Cell Biology* *27*, 906-916.
- 1096 Brown, N.R., Korolchuk, S., Martin, M.P., Stanley, W.A., Moukhametzianov, R., Noble,  
1097 M.E.M., and Endicott, J.A. (2015). CDK1 structures reveal conserved and unique features of  
1098 the essential cell cycle CDK. *Nature Communications*.

1099 Brown, N.R., Noble, M.E.M., Endicott, J.A., Garman, E.F., Wakatsuki, S., Mitchell, E.,  
1100 Rasmussen, B., Hunt, T., and Johnson, L.N. (1995). The crystal structure of cyclin A.  
1101 *Structure* 3, 1235-1247.

1102 Brown, N.R., Noble, M.E.M., Endicott, J.A., and Johnson, L.N. (1999a). The structural basis  
1103 for specificity of substrate and recruitment peptides for cyclin-dependent kinases. *Nature*  
1104 *Cell Biology* 1, 438-443.

1105 Brown, N.R., Noble, M.E.M., Lawrie, A.M., Morris, M.C., Tunnah, P., Divita, G., Johnson,  
1106 L.N., and Endicott, J.A. (1999b). Effects of Phosphorylation of Threonine 160 on Cyclin-  
1107 dependent Kinase 2 Structure and Activity\*. *Journal of Biological Chemistry* 274, 8746-8756.

1108 Castilho, P.V., Williams, B.C., Mochida, S., Zhao, Y., and Goldberg, M.L. (2009). The M  
1109 phase kinase Greatwall (Gwl) promotes inactivation of PP2A/B55delta, a phosphatase  
1110 directed against CDK phosphosites. *Mol Biol Cell* 20, 4777-4789.

1111 Chen, C., Ha, B.H., Thévenin, A.F., Lou, H.J., Zhang, R., Yip, K.Y., Peterson, J.R., Gerstein,  
1112 M., Kim, P.M., Filippakopoulos, P., *et al.* (2014). Identification of a Major Determinant for  
1113 Serine-Threonine Kinase Phosphoacceptor Specificity. *Molecular Cell* 53, 140-147.

1114 Colaert, N., Helsens, K., Martens, L., Vandekerckhove, J., and Gevaert, K. (2009). Improved  
1115 visualization of protein consensus sequences by iceLogo. *Nature Methods* 6, 786-787.

1116 Coudreuse, D., and Nurse, P. (2010). Driving the cell cycle with a minimal CDK control  
1117 network. *Nature* 468, 1074-1080.

1118 Cox, J., and Mann, M. (2008). MaxQuant enables high peptide identification rates,  
1119 individualized p.p.b.-range mass accuracies and proteome-wide protein quantification.  
1120 *Nature Biotechnology* 26, 1367-1372.

1121 Crooks, G.E., Hon, G., Chandonia, J.-M., and Brenner, S.E. (2004). WebLogo: a sequence  
1122 logo generator. *Genome Res* 14, 1188-1190.

1123 Cundell, M.J., Hutter, L.H., Nunes Bastos, R., Poser, E., Holder, J., Mohammed, S., Novak,  
1124 B., and Barr, F.A. (2016). A PP2A-B55 recognition signal controls substrate  
1125 dephosphorylation kinetics during mitotic exit. *J Cell Biol* 214, 539-554.

1126 Cuylen-Haering, S., Petrovic, M., Hernandez-Armendariz, A., Schneider, M.W.G., Samwer,  
1127 M., Blaukopf, C., Holt, L.J., and Gerlich, D.W. (2020). Ki-67-regulated chromosome  
1128 clustering excludes cytoplasm during nuclear assembly. *Nature*.

1129 Cuylen, S., Blaukopf, C., Politi, A.Z., Muller-Reichert, T., Neumann, B., Poser, I., Ellenberg,  
1130 J., Hyman, A.A., and Gerlich, D.W. (2016). Ki-67 acts as a biological surfactant to disperse  
1131 mitotic chromosomes. *Nature*.

1132 Dephoure, N., Zhou, C., Villén, J., Beausoleil, S.A., Bakalarski, C.E., Elledge, S.J., and Gygi,  
1133 S.P. (2008). A quantitative atlas of mitotic phosphorylation. *Proceedings of the National*  
1134 *Academy of Sciences of the United States of America*.



1135 Fisher, D.L., and Nurse, P. (1996). A single fission yeast mitotic cyclin B p34cdc2 kinase  
1136 promotes both S-phase and mitosis in the absence of G1 cyclins. *EMBO J* 15, 850-860.

1137 Ganoth, D., Bornstein, G., Ko, T.K., Larsen, B., Tyers, M., Pagano, M., and Hershko, A.  
1138 (2001). The cell-cycle regulatory protein Cks1 is required for SCFSkp2-mediated  
1139 ubiquitinylation of p27. *Nature Cell Biology*.

1140 Gavet, O., and Pines, J. (2010). Progressive Activation of CyclinB1-Cdk1 Coordinates Entry  
1141 to Mitosis. *Developmental Cell*.

1142 Gong, D., Pomerening, J.R., Myers, J.W., Gustavsson, C., Jones, J.T., Hahn, A.T., Meyer,  
1143 T., and Ferrell, J.E. (2007). Cyclin A2 Regulates Nuclear-Envelope Breakdown and the  
1144 Nuclear Accumulation of Cyclin B1. *Current Biology*.

1145 Hégarat, N., Crncec, A., Suarez Peredo Rodriguez, M.F., Echeagaray Iturra, F., Gu, Y.,  
1146 Busby, O., Lang, P.F., Barr, A.R., Bakal, C., Kanemaki, M.T., *et al.* (2020). Cyclin A triggers  
1147 Mitosis either via the Greatwall kinase pathway or Cyclin B. *EMBO J*.

1148 Herr, P., Boström, J., Rullman, E., Rudd, S.G., Vesterlund, M., Lehtiö, J., Helleday, T.,  
1149 Maddalo, G., and Altun, M. (2020). Cell Cycle Profiling Reveals Protein Oscillation,  
1150 Phosphorylation, and Localization Dynamics. *Mol Cell Proteomics* 19, 608-623.

1151 Holder, J., Mohammed, S., and Barr, F.A. (2020). Ordered dephosphorylation initiated by the  
1152 selective proteolysis of cyclin B drives mitotic exit. *Elife*.

1153 Holt, L.J., Tuch, B.B., Villen, J., Johnson, A.D., Gygi, S.P., and Morgan, D.O. (2009). Global  
1154 analysis of cdk1 substrate phosphorylation sites provides insights into evolution. *Science*.

1155 Jackman, M., Kubota, Y., Den Elzen, N., Hagting, A., and Pines, J. (2002). Cyclin A- and  
1156 cyclin E-Cdk complexes shuttle between the nucleus and the cytoplasm. *Mol Biol Cell*.

1157 Kabeche, L., and Compton, D.A. (2013). Cyclin A regulates kinetochore microtubules to  
1158 promote faithful chromosome segregation. *Nature*.

1159 Kelly, V., al-Rawi, A., Lewis, D., Kustatscher, G., and Ly, T. (2022). Low Cell Number  
1160 Proteomic Analysis Using In-Cell Protease Digests Reveals a Robust Signature for Cell  
1161 Cycle State Classification. *Molecular & Cellular Proteomics* 21.

1162 Kettenbach, A.N., Schweppe, D.K., Faherty, B.K., Pechenick, D., Pletnev, A.A., and Gerber,  
1163 S.A. (2011). Quantitative phosphoproteomics identifies substrates and functional modules of  
1164 Aurora and Polo-like kinase activities in mitotic cells. *Science Signaling*.

1165 Kõivomägi, M., Örd, M., Iofik, A., Valk, E., Venta, R., Faustova, I., Kivi, R., Balog, E.R.M.,  
1166 Rubin, S.M., and Loog, M. (2013). Multisite phosphorylation networks as signal processors  
1167 for Cdk1. *Nat Struct Mol Biol* 20, 1415-1424.

1168 Kõivomägi, M., Valk, E., Venta, R., Iofik, A., Lepiku, M., Balog, E.R.M., Rubin, S.M., Morgan,  
1169 D.O., and Loog, M. (2011). Cascades of multisite phosphorylation control Sic1 destruction at  
1170 the onset of S phase. *Nature*.



1171 Krasinska, L., Domingo-Sananes, Maria R., Kapuy, O., Parisis, N., Harker, B., Moorhead,  
1172 G., Rossignol, M., Novák, B., and Fisher, D. (2011). Protein Phosphatase 2A Controls the  
1173 Order and Dynamics of Cell-Cycle Transitions. *Molecular Cell* 44, 437-450.

1174 Kruse, T., Gnosa, S.P., Nasa, I., Garvanska, D.H., Hein, J.B., Nguyen, H., Samsøe-  
1175 Petersen, J., Lopez-Mendez, B., Hertz, E.P.T., Schwarz, J., *et al.* (2020). Mechanisms of  
1176 site-specific dephosphorylation and kinase opposition imposed by PP2A regulatory subunits.  
1177 *EMBO J* 39, e103695-e103695.

1178 Lau, H.W., Ma, H.T., Yeung, T.K., Tam, M.Y., Zheng, D., Chu, S.K., and Poon, R.Y.C.  
1179 (2021). Quantitative differences between cyclin-dependent kinases underlie the unique  
1180 functions of CDK1 in human cells. *Cell Reports* 37, 109808.

1181 Loog, M., and Morgan, D.O. (2005). Cyclin specificity in the phosphorylation of cyclin-  
1182 dependent kinase substrates. *Nature* 434, 104-108.

1183 Lowe, E.D., Tews, I., Cheng, K.Y., Brown, N.R., Gul, S., Noble, M.E.M., Gamblin, S.J., and  
1184 Johnson, L.N. (2002). Specificity Determinants of Recruitment Peptides Bound to Phospho-  
1185 CDK2/Cyclin A. *Biochemistry* 41, 15625-15634.

1186 Ly, T., Ahmad, Y., Shlien, A., Soroka, D., Mills, A., Emanuele, M.J., Stratton, M.R., and  
1187 Lamond, A.I. (2014). A proteomic chronology of gene expression through the cell cycle in  
1188 human myeloid leukemia cells. *Elife*.

1189 Ly, T., Whigham, A., Clarke, R., Brenes-Murillo, A.J., Estes, B., Madhessian, D., Lundberg,  
1190 E., Wadsworth, P., and Lamond, A.I. (2017). Proteomic analysis of cell cycle progression in  
1191 asynchronous cultures, including mitotic subphases, using PRIMMUS. *Elife*.

1192 Martinsson-Ahlzén, H.-S., Liberal, V., Grünenfelder, B., Chaves, S.R., Spruck, C.H., and  
1193 Reed, S.I. (2008). Cyclin-Dependent Kinase-Associated Proteins Cks1 and Cks2 Are  
1194 Essential during Early Embryogenesis and for Cell Cycle Progression in Somatic Cells.  
1195 *Molecular and Cellular Biology*.

1196 McAlister, G.C., Nusinow, D.P., Jedrychowski, M.P., Wühr, M., Huttlin, E.L., Erickson, B.K.,  
1197 Rad, R., Haas, W., and Gygi, S.P. (2014). MultiNotch MS3 enables accurate, sensitive, and  
1198 multiplexed detection of differential expression across cancer cell line proteomes. *Anal*  
1199 *Chem* 86, 7150-7158.

1200 McGrath, D.A., Balog, E.R.M., Kõivomägi, M., Lucena, R., Mai, M.V., Hirschi, A., Kellogg,  
1201 D.R., Loog, M., and Rubin, S.M. (2013). Cks confers specificity to phosphorylation-  
1202 dependent CDK signaling pathways. *Nat Struct Mol Biol* 20, 1407-1414.

1203 Michowski, W., Chick, J.M., Chu, C., Kolodziejczyk, A., Wang, Y., Suski, J.M., Abraham, B.,  
1204 Anders, L., Day, D., Dunkl, L.M., *et al.* (2020). Cdk1 Controls Global Epigenetic Landscape  
1205 in Embryonic Stem Cells. *Molecular Cell*.

1206 Mitra, J., and Enders, G.H. (2004). Cyclin A/Cdk2 complexes regulate activation of Cdk1 and  
1207 Cdc25 phosphatases in human cells. *Oncogene*.

- 1208 Mochida, S., Ikeo, S., Gannon, J., and Hunt, T. (2009). Regulated activity of PP2A-B55 delta  
1209 is crucial for controlling entry into and exit from mitosis in *Xenopus* egg extracts. *EMBO J* 28,  
1210 2777-2785.
- 1211 Mok, J., Kim Pm Fau - Lam, H.Y.K., Lam Hy Fau - Piccirillo, S., Piccirillo S Fau - Zhou, X.,  
1212 Zhou X Fau - Jeschke, G.R., Jeschke Gr Fau - Sheridan, D.L., Sheridan DI Fau - Parker,  
1213 S.A., Parker Sa Fau - Desai, V., Desai V Fau - Jwa, M., Jwa M Fau - Cameroni, E., *et al.*  
1214 Deciphering protein kinase specificity through large-scale analysis of yeast phosphorylation  
1215 site motifs.
- 1216 Moore, J.D., Kornbluth, S., and Hunt, T. (2002). Identification of the nuclear localization  
1217 signal in *Xenopus* cyclin E and analysis of its role in replication and mitosis. *Mol Biol Cell*.
- 1218 Morgan, D.O. (1997). CYCLIN-DEPENDENT KINASES: Engines, Clocks, and  
1219 Microprocessors. *Annual Review of Cell and Developmental Biology*.
- 1220 Odle, R.I., Florey, O., Ktistakis, N.T., and Cook, S.J. (2021). CDK1, the Other 'Master  
1221 Regulator' of Autophagy. In *Trends in Cell Biology*.
- 1222 Olsen, J.V., Vermeulen, M., Santamaria, A., Kumar, C., Miller, M.L., Jensen, L.J., Gnad, F.,  
1223 Cox, J., Jensen, T.S., Nigg, E.A., *et al.* (2010). Quantitative Phosphoproteomics Reveals  
1224 Widespread Full Phosphorylation Site Occupancy During Mitosis -- Olsen et al. 3 (104): ra3 -  
1225 - Science Signaling (Supplemental). *Science signaling*.
- 1226 Örd, M., and Loog, M. (2019). How the cell cycle clock ticks. *Mol Biol Cell* 30, 169-172.
- 1227 Örd, M., Venta, R., Möll, K., Valk, E., and Loog, M. (2019). Cyclin-Specific Docking  
1228 Mechanisms Reveal the Complexity of M-CDK Function in the Cell Cycle. *Molecular Cell* 75,  
1229 76-89.e73.
- 1230 Pagliuca, F.W., Collins, M.O., Lichawska, A., Zegerman, P., Choudhary, J.S., and Pines, J.  
1231 (2011). Quantitative Proteomics Reveals the Basis for the Biochemical Specificity of the Cell-  
1232 Cycle Machinery. *Molecular Cell*.
- 1233 Pereverzeva, I., Whitmire, E., Khan, B., and Coué, M. (2000). Distinct Phosphoisoforms of  
1234 the *Xenopus*Mcm4 Protein Regulate the Function of the Mcm Complex. *Molecular and*  
1235 *Cellular Biology* 20, 3667-3676.
- 1236 Petri, E.T., Errico, A., Escobedo, L., Hunt, T., and Basavappa, R. (2007). The Crystal  
1237 Structure of Human Cyclin B. *Cell Cycle* 6, 1342-1349.
- 1238 Russell, P., and Nurse, P. (1986). *cdc25+* functions as an inducer in the mitotic control of  
1239 fission yeast. *Cell*.
- 1240 Russell, P., and Nurse, P. (1987). Negative regulation of mitosis by *wee1+*, a gene encoding  
1241 a protein kinase homolog. *Cell*.
- 1242 Samejima, K., Platani, M., Wolny, M., Ogawa, H., Vargiu, G., Knight, P.J., Peckham, M., and  
1243 Earnshaw, W.C. (2015). The Inner Centromere Protein (INCENP) Coil Is a Single  $\alpha$ -Helix  
1244 (SAH) Domain That Binds Directly to Microtubules and Is Important for Chromosome

1245 Passenger Complex (CPC) Localization and Function in Mitosis\*. *Journal of Biological*  
1246 *Chemistry* 290, 21460-21472.

1247 Santamaría, D., Barrière, C., Cerqueira, A., Hunt, S., Tardy, C., Newton, K., Cáceres, J.F.,  
1248 Dubus, P., Malumbres, M., and Barbacid, M. (2007). Cdk1 is sufficient to drive the  
1249 mammalian cell cycle. *Nature*.

1250 Satyanarayana, A., and Kaldis, P. (2009). Mammalian cell-cycle regulation: several Cdks,  
1251 numerous cyclins and diverse compensatory mechanisms. *Oncogene* 28, 2925-2939.

1252 Schulman, B.A., Lindstrom, D.L., and Harlow, E. (1998). Substrate recruitment to cyclin-  
1253 dependent kinase 2 by a multipurpose docking site on cyclin A. *Proceedings of the National*  
1254 *Academy of Sciences of the United States of America*.

1255 Singh, P., Pesenti, M.E., Maffini, S., Carmignani, S., Hedtfeld, M., Petrovic, A.,  
1256 Srinivasamani, A., Bange, T., and Musacchio, A. (2021). BUB1 and CENP-U, Primed by  
1257 CDK1, Are the Main PLK1 Kinetochore Receptors in Mitosis. *Molecular Cell* 81, 67-87.e69.

1258 Sitry, D., Seeliger, M.A., Ko, T.K., Ganoth, D., Breward, S.E., Itzhaki, L.S., Pagano, M., and  
1259 Hershko, A. (2002). Three different binding sites of Cks1 are required for p27-ubiquitin  
1260 ligation. *Journal of Biological Chemistry*.

1261 Stern, B., and Nurse, P. (1996). A quantitative model for the cdc2 control of S phase and  
1262 mitosis in fission yeast. *Trends in Genetics* 12, 345-350.

1263 Suzuki, K., Sako, K., Akiyama, K., Isoda, M., Senoo, C., Nakajo, N., and Sagata, N. (2015).  
1264 Identification of non-Ser/Thr-Pro consensus motifs for Cdk1 and their roles in mitotic  
1265 regulation of C2H2 zinc finger proteins and Ect2. *Scientific Reports* 5, 7929.

1266 Swaffer, M.P., Jones, A.W., Flynn, H.R., Snijders, A.P., and Nurse, P. (2016). CDK  
1267 Substrate Phosphorylation and Ordering the Cell Cycle. *Cell* 167, 1750-1761.e1716.

1268 Takeda, D.Y., Wohlschlegel, J.A., and Dutta, A. (2001). A bipartite substrate recognition  
1269 motif for cyclin-dependent kinases. *Journal of Biological Chemistry*.

1270 Toyoshima, F., Moriguchi, T., Wada, A., Fukuda, M., and Nishida, E. (1998). Nuclear export  
1271 of cyclin B1 and its possible role in the DNA damage-induced G2 checkpoint. *EMBO*  
1272 *Journal*.

1273 Trunnell, N.B., Poon, A.C., Kim, S.Y., and Ferrell, J.E., Jr. (2011). Ultrasensitivity in the  
1274 Regulation of Cdc25C by Cdk1. *Molecular cell* 41, 263-274.

1275 Vigneron, S., Brioude, E., Burgess, A., Labbé, J.-C., Lorca, T., and Castro, A. (2009).  
1276 Greatwall maintains mitosis through regulation of PP2A. *EMBO J* 28, 2786-2793.

1277 Wiśniewski, J.R., Hein, M.Y., Cox, J., and Mann, M. (2014). A "proteomic ruler" for protein  
1278 copy number and concentration estimation without spike-in standards. *Molecular and*  
1279 *Cellular Proteomics*.

1280

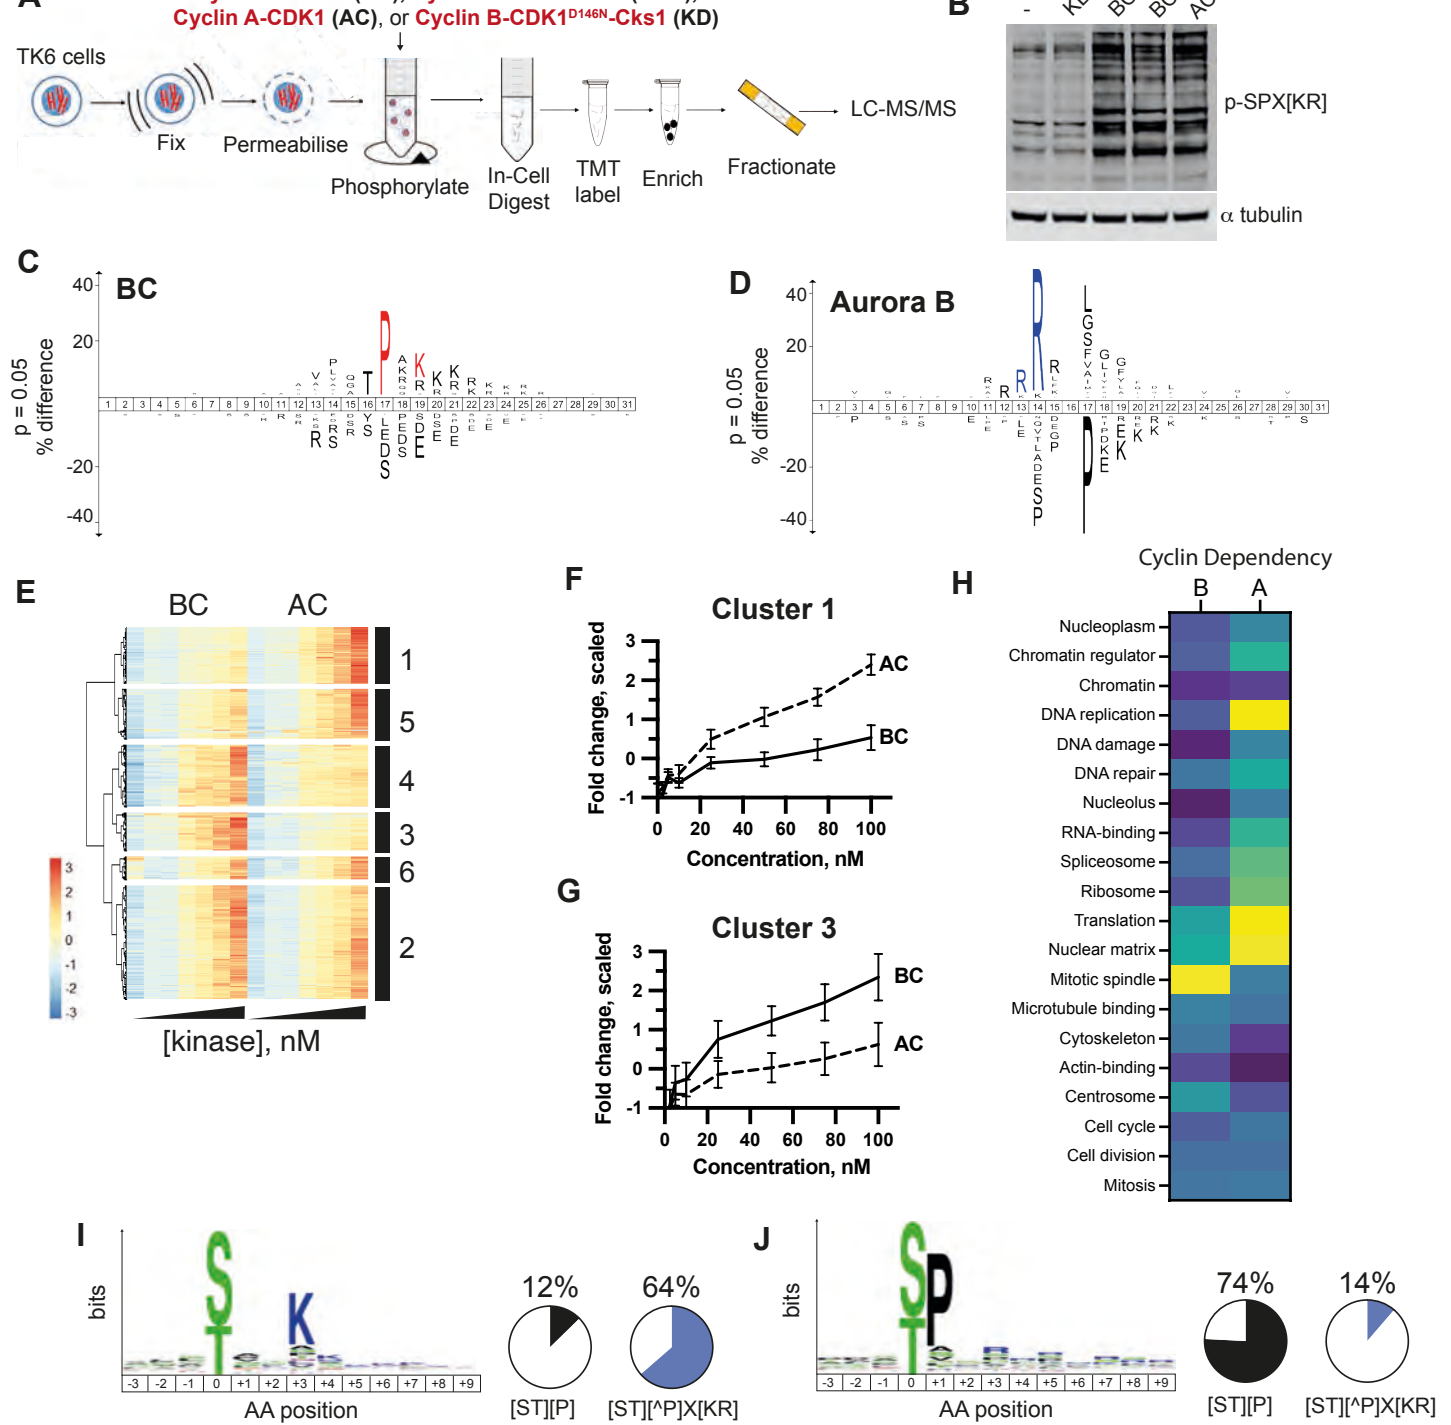

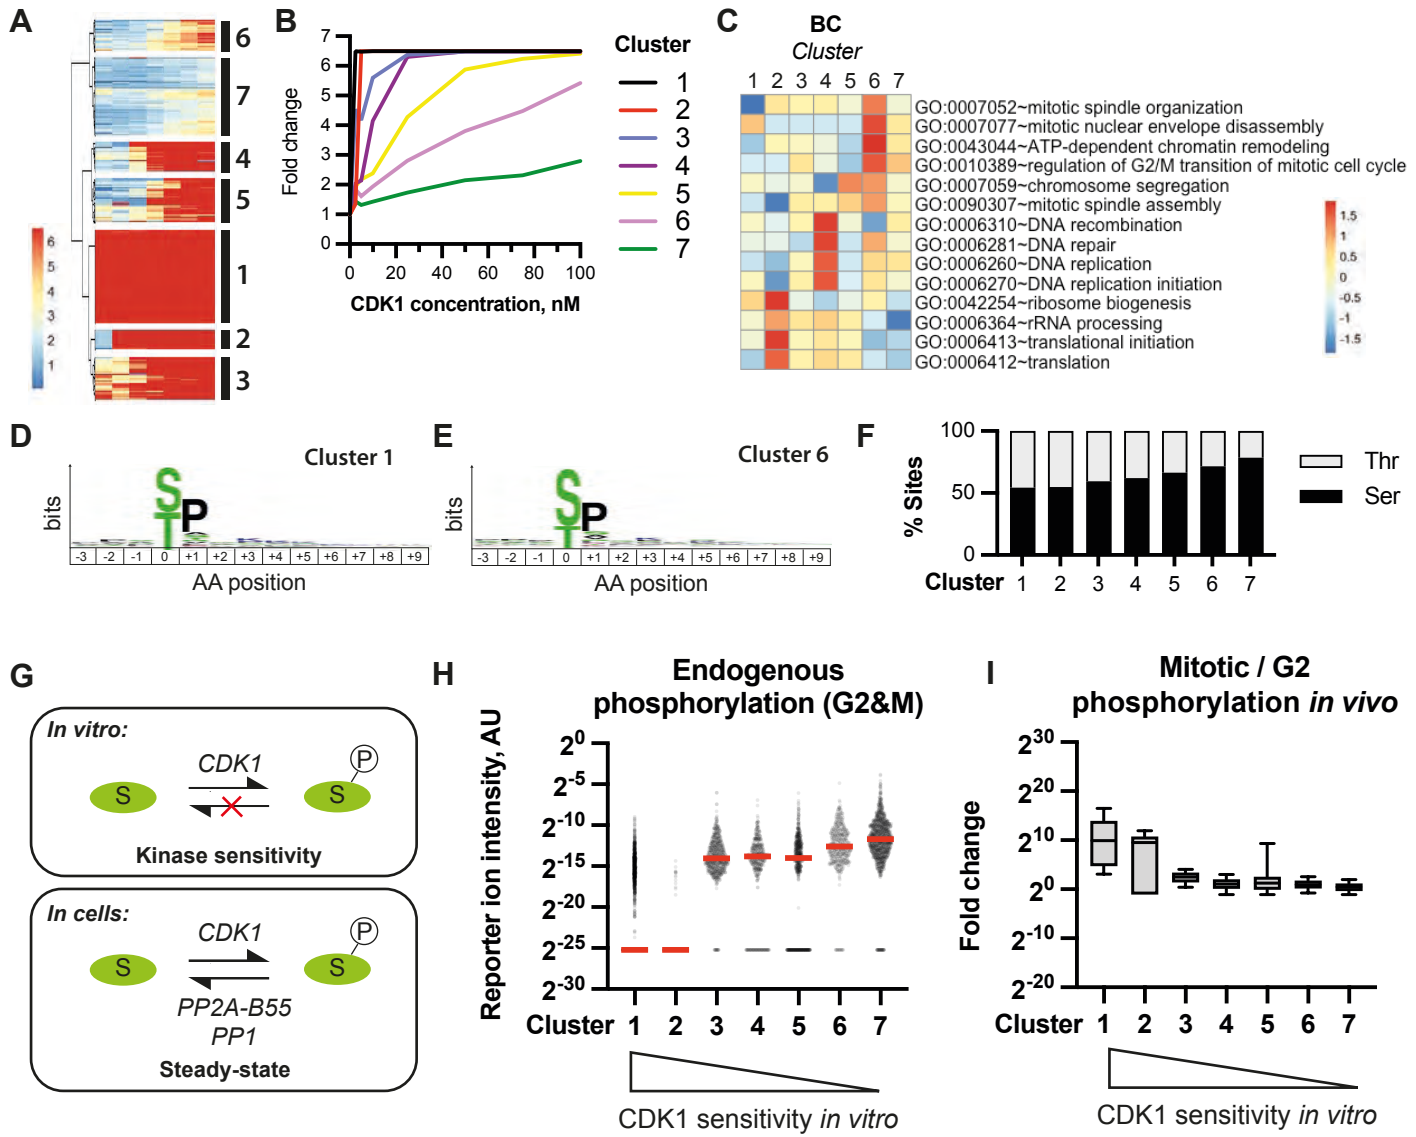

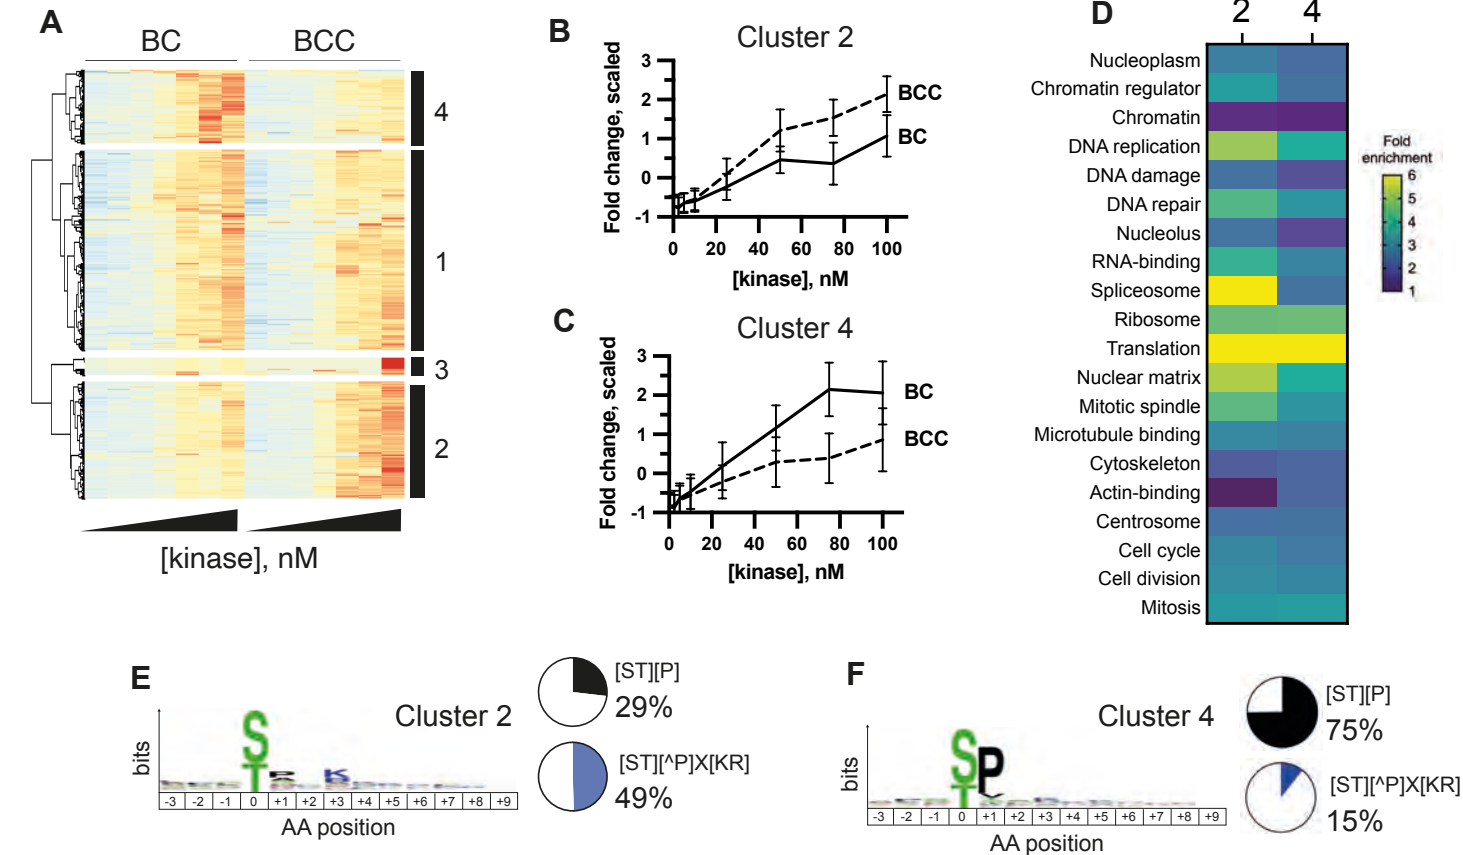



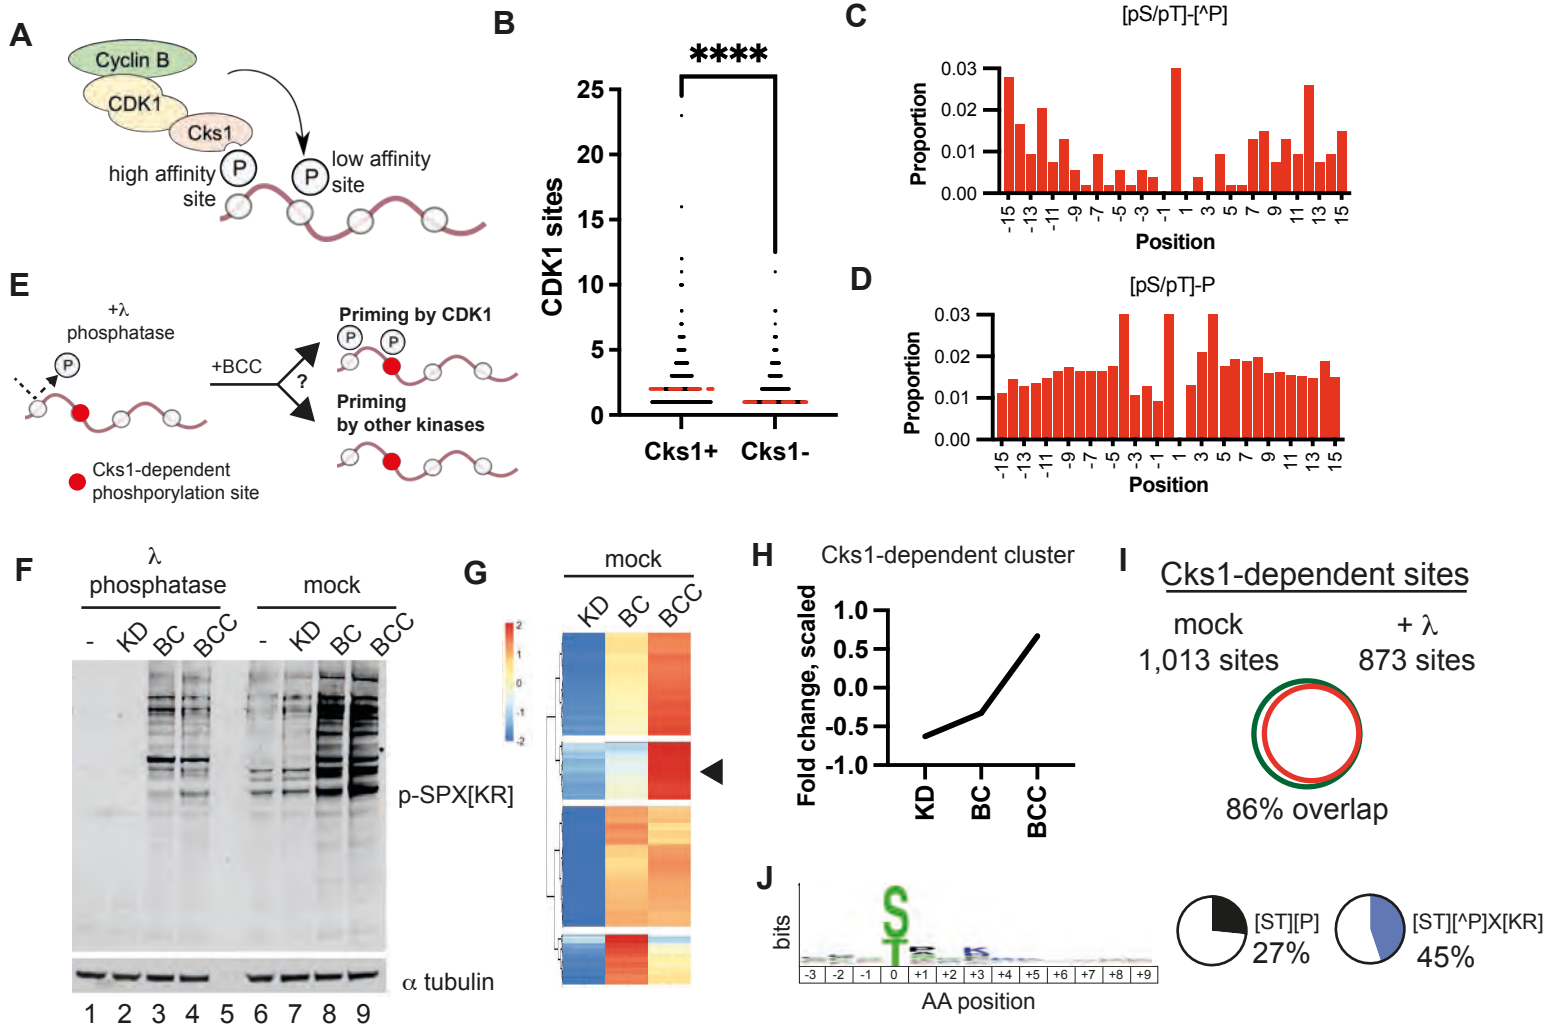

**A**

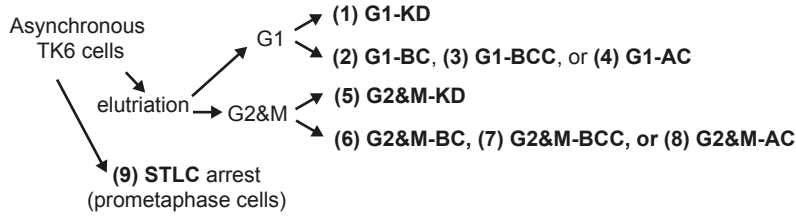

$$\frac{(5) \text{ G2\&M-KD}}{(1) \text{ G1-KD}} > 2\text{-fold} \rightarrow \text{Interphase CCR}$$

$$\frac{(9) \text{ STLC}}{(5) \text{ G2\&M-KD}} > 2\text{-fold} \rightarrow \text{Mitotic CCR}$$

**C**

Mitotic CCR  
 ↓  
 Phosphorylated by BC or BCC in vitro?

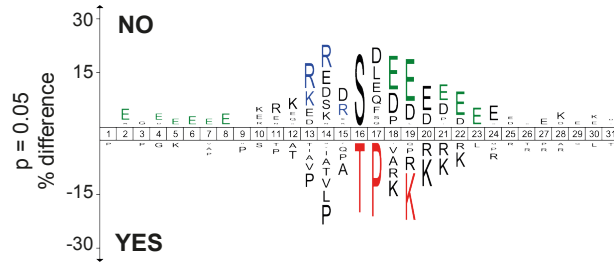

**B**

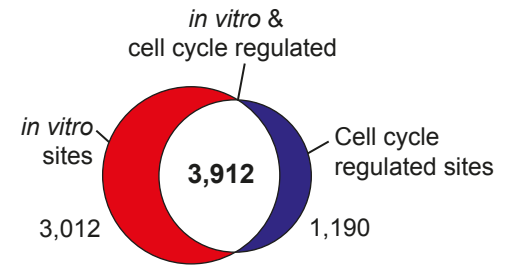

**D**

Interphase CCR  
 ↓  
 Phosphorylated by AC or BC in vitro?

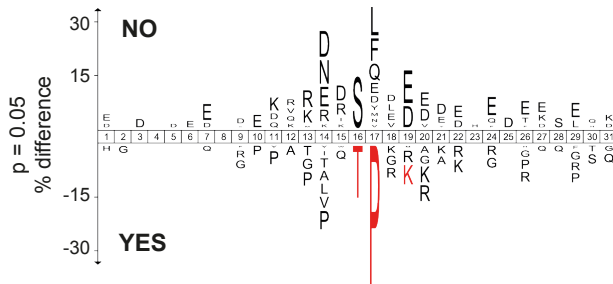

**E**

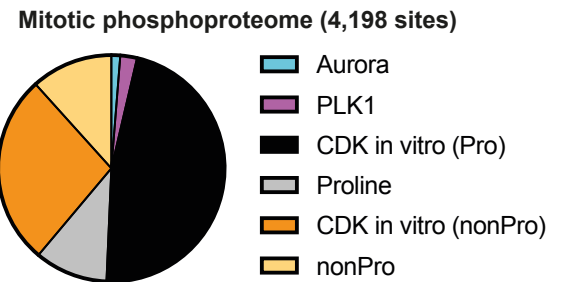

**F**

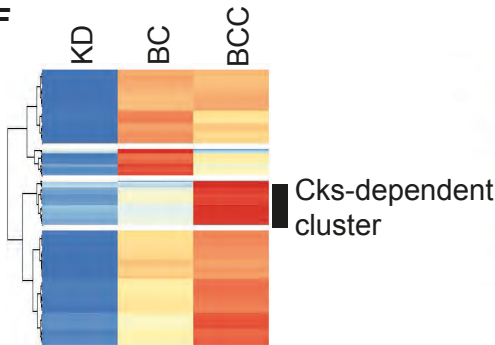

**G**

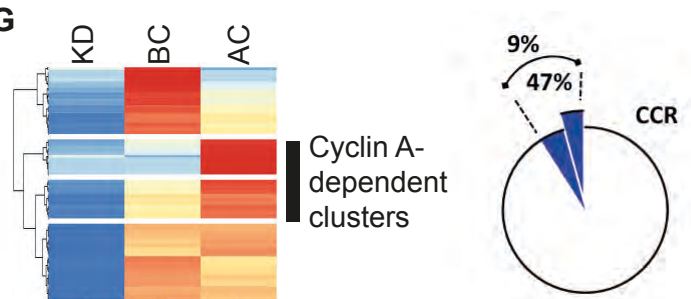

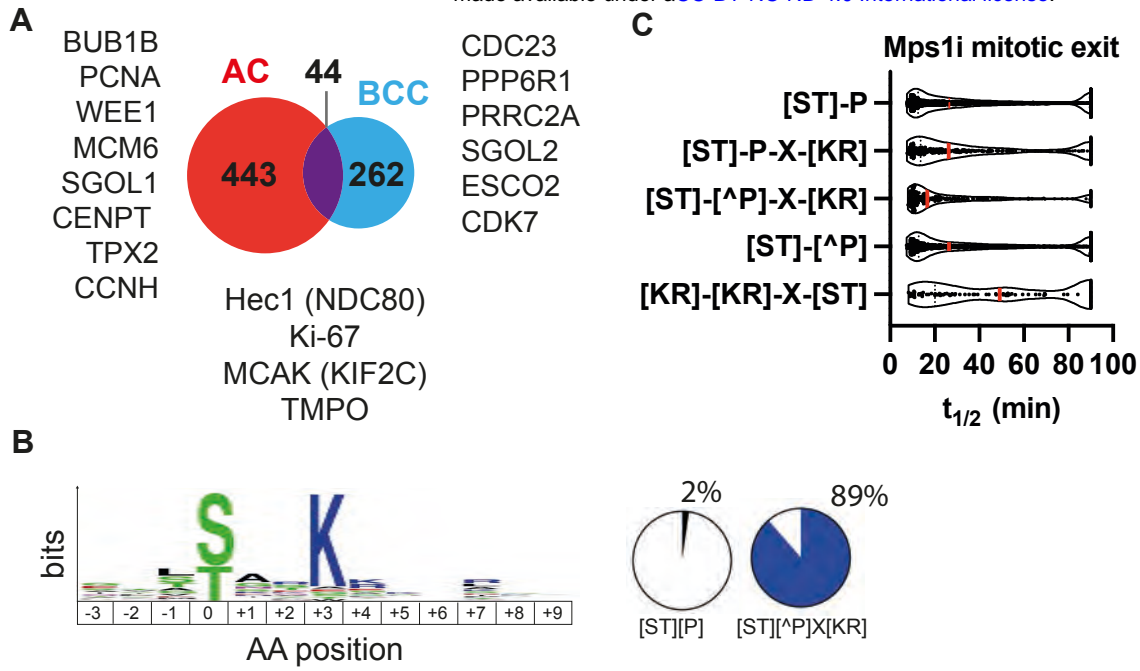

## Supplementary Figure 1

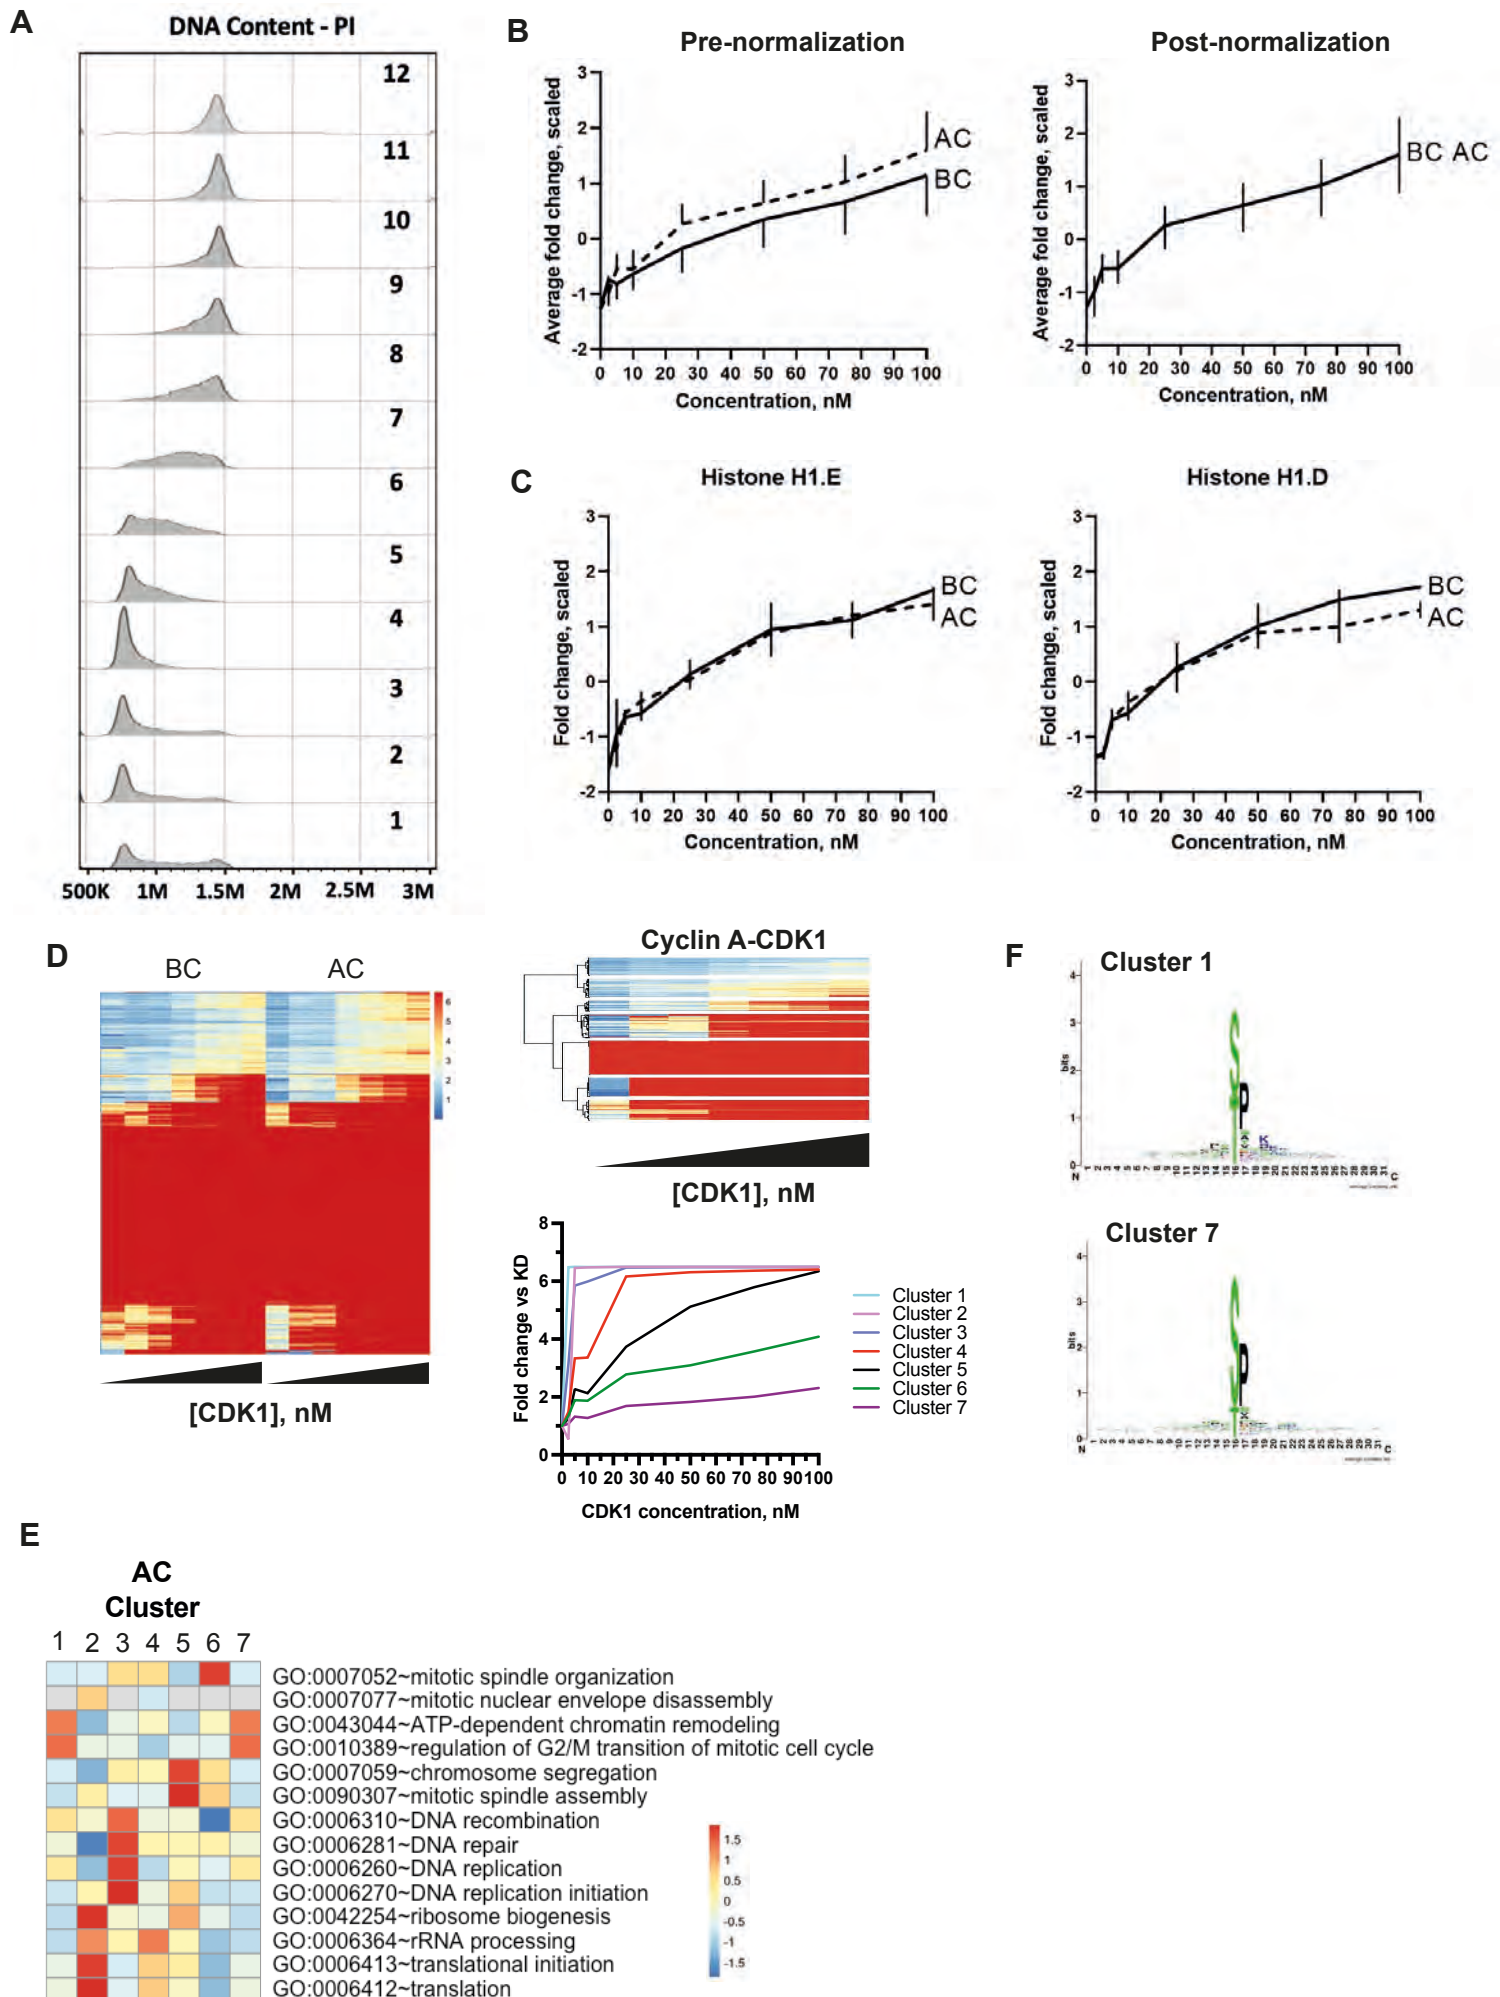

## Supplementary Figure 2

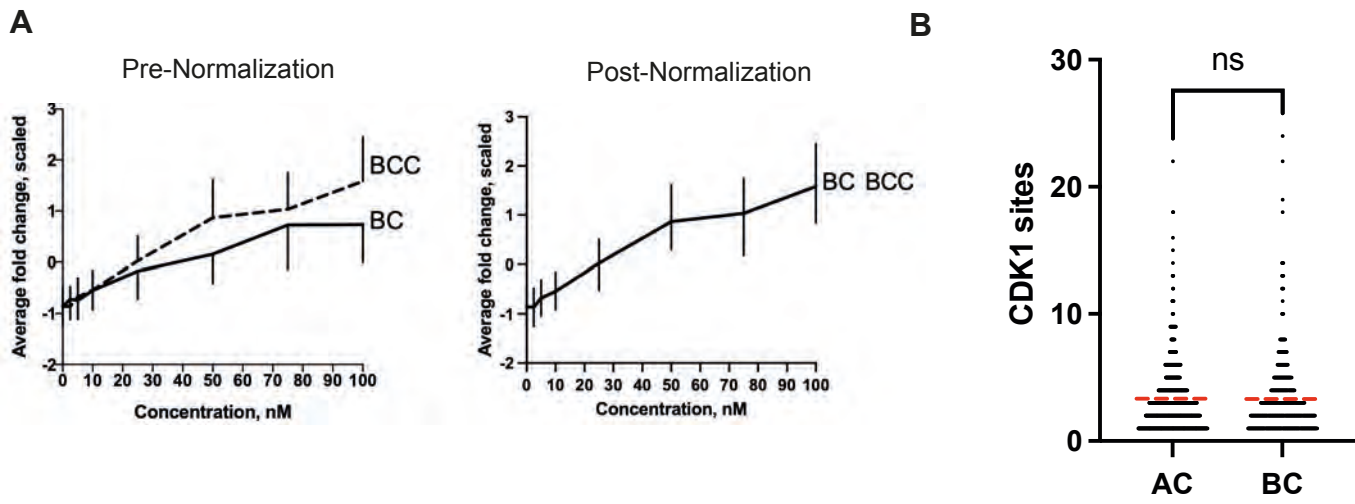

## Supplementary Figure 3

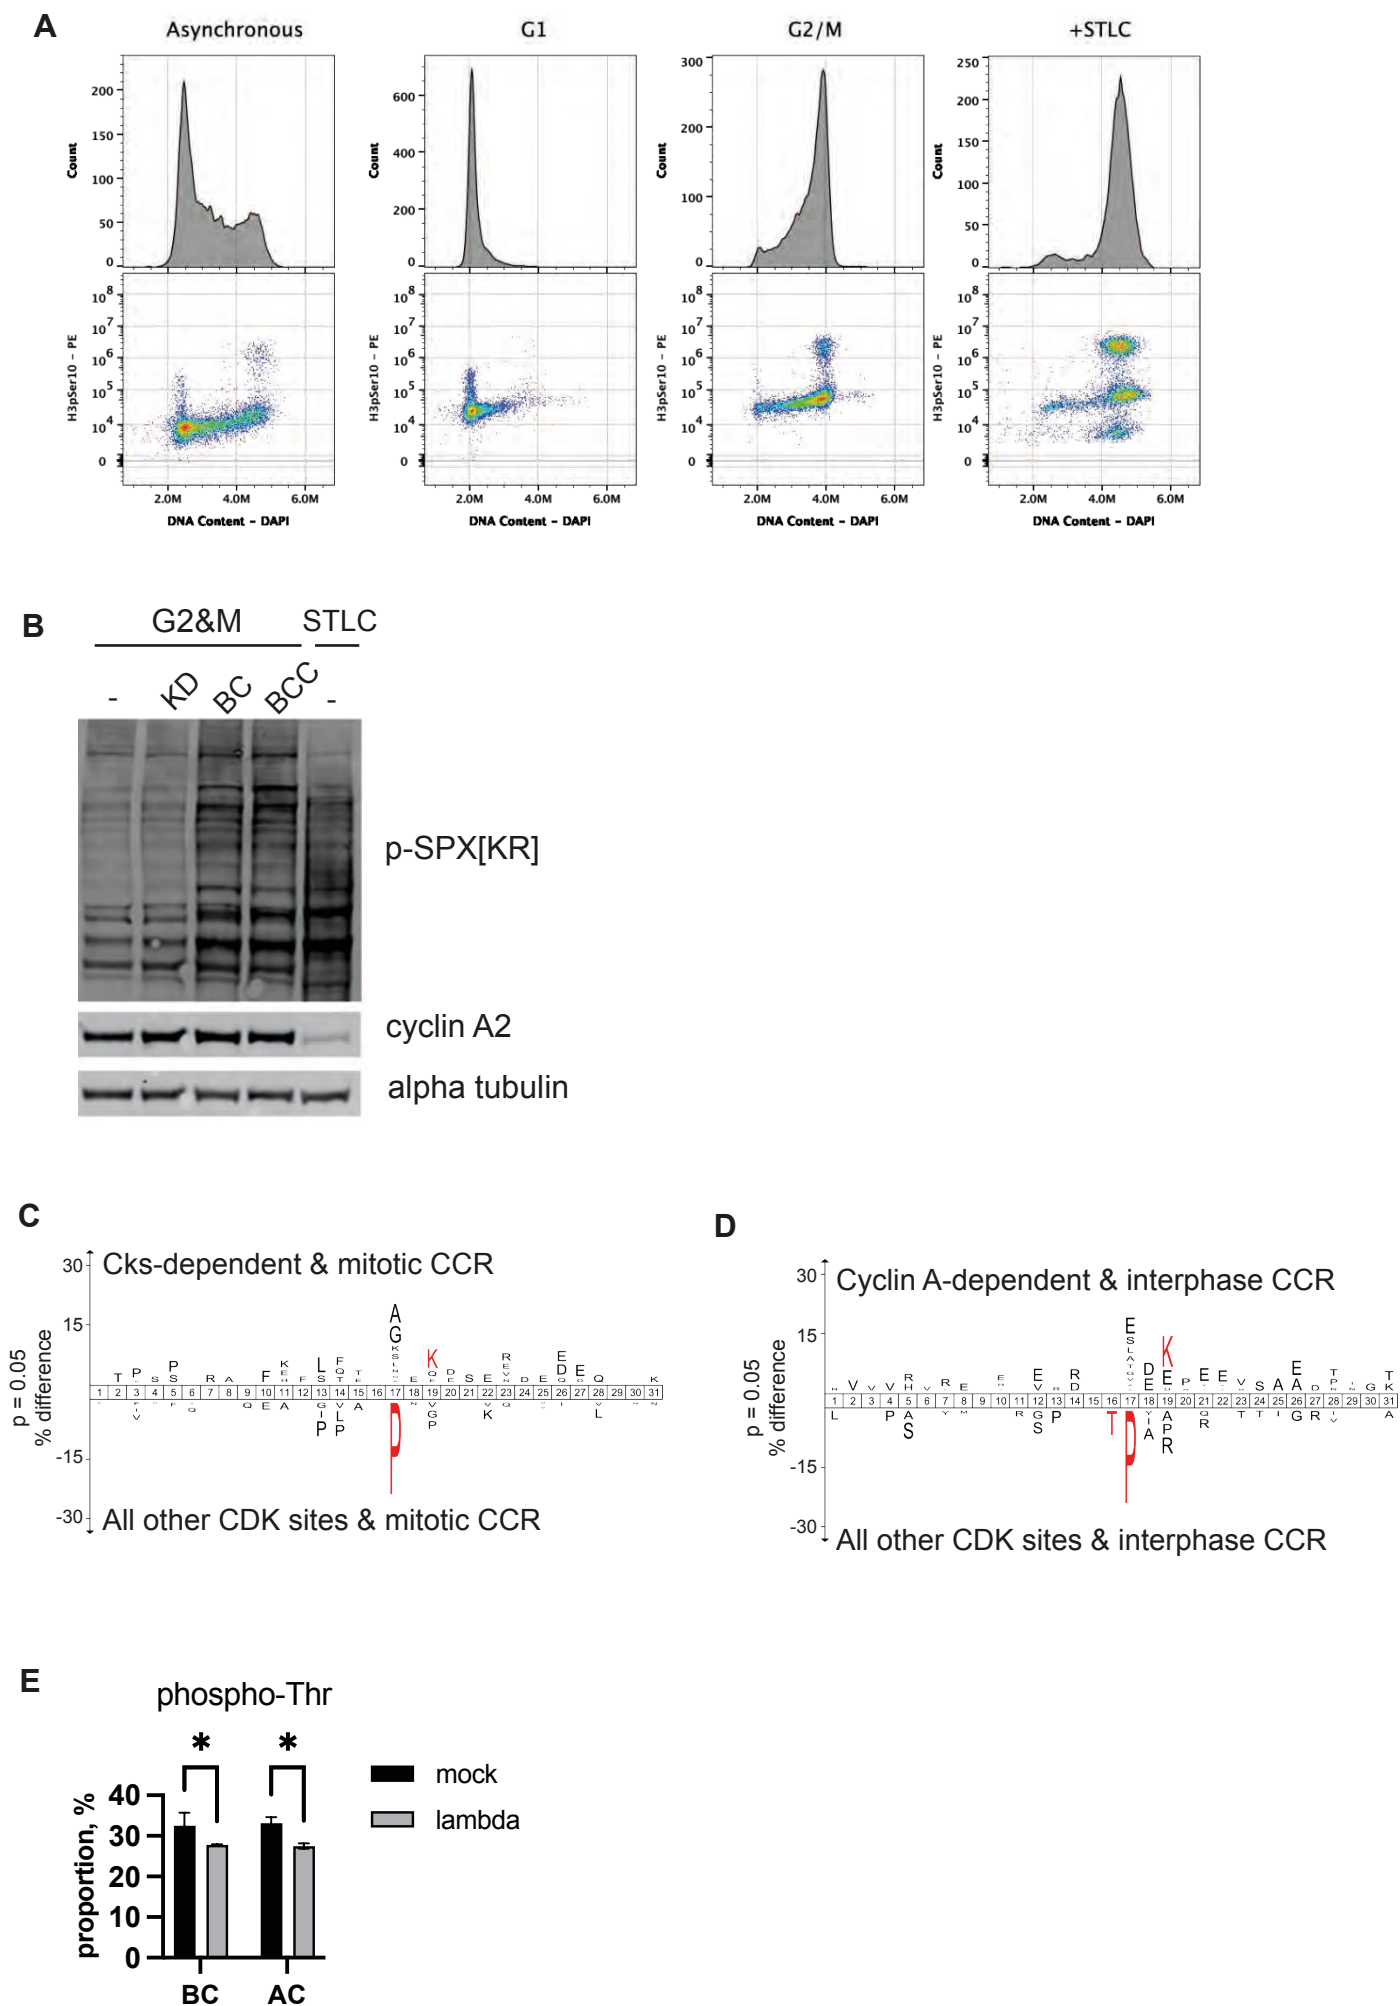

Source: http://biorxiv.org/content/10.1101/2022.05.24.493195v1.full.pdf
